# Supplementary material for: 4-Dialkylamino-2,5-dihydroimidazol-1-oxyls with Functional Groups at the Position 2 and at the Exocyclic Nitrogen: The pH-Sensitive Spin Labels
Source: MDPI journal article supplement (doi:10.3390/gels8010011), 2021-12-23
Supplement: s1 [file s1]

# 4-Dialkylamino-2,5-dihydroimidazol-1-oxyls with Functional Groups at the Position 2 and at the Exocyclic Nitrogen: The pH-Sensitive Spin Labels

Dmitrii G. Trofimov <sup>1</sup>, Yuri I. Glazachev <sup>2</sup>, Artem A. Gorodetsky <sup>1</sup>, Denis A. Komarov <sup>1</sup>, Tatyana V. Rybalova <sup>1</sup> and Igor A. Kirilyuk <sup>1,\*</sup>

## Table of Contents

|                                                                                                                                                                      |           |
|----------------------------------------------------------------------------------------------------------------------------------------------------------------------|-----------|
| <b>1. IR spectra .....</b>                                                                                                                                           | <b>S4</b> |
| 1.1. 2-(4-(Azidomethyl)phenyl)-2,5,5-triethyl-4-pyrrolidino-2,5-dihydro-1H-imidazol-1-oxyl (5) (KBr) .....                                                           | S4        |
| 1.2. Tetraisopropyl but-3-yne-1,1-diylidiphosphonate (6) (neat) .....                                                                                                | S4        |
| 1.3. 2-(4-((4-(2,2-Bis(diisopropoxyphosphoryl)ethyl)-1H-1,2,3-triazol-1-yl)methyl)phenyl)-2,5,5-triethyl-4-pyrrolidino-2,5-dihydro-1H-imidazol-1-oxyl(7) (neat)..... | S4        |
| 1.4. 2,5,5-Triethyl-2-(4-formylphenyl)-4-pyrrolidino-2,5-dihydro-1H-imidazol-1-oxyl (9) (KBr) .....                                                                  | S5        |
| 1.5. 2,5,5-Triethyl-2-(4-ethynylphenyl)-4-pyrrolidino-2,5-dihydro-1H-imidazol-1-oxyl (11) (KBr).....                                                                 | S5        |
| 1.6. 2-(4-Carboxyphenyl)-2,5,5-triethyl-4-pyrrolidino-2,5-dihydro-1H-imidazol-1-oxyl (12)(KBr) .....                                                                 | S5        |
| 1.7. 2-(4-(Ethoxycarbonyl)phenyl)-2,5,5-triethyl-4-pyrrolidino-2,5-dihydro-1H-imidazol-1-oxyl (14) (KBr) .....                                                       | S6        |
| 1.8. 2-(4-((2,5-Dioxopyrrolidinooxy)carbonyl)phenyl)-2,5,5-triethyl-4-pyrrolidino-2,5-dihydro-1H-imidazol-1-oxyl (15) (KBr) .....                                    | S6        |
| 1.9. 2-(4-((3-Carboxypropanoyloxy)methyl)phenyl)-2,5,5-triethyl-4-pyrrolidino-2,5-dihydro-1H-imidazol-1-oxyl (16) (KBr) .....                                        | S6        |
| 1.10. 2-Allyl-2-ethyl-5,5-dimethyl-4-(pyrrolidino)-2,5-dihydroimidazol-1-oxyl (18a) (KBr).....                                                                       | S7        |
| 1.11. 2-Ethyl-5,5-dimethyl-2-(pent-4-enyl)-4-(pyrrolidino)-2,5-dihydroimidazol-1-oxyl (18b) (KBr).....                                                               | S7        |
| 1.12. 2-Ethyl-2-(3-hydroxypropyl)-5,5-dimethyl-4-(pyrrolidino)-2,5-dihydroimidazol-1-oxyl (19a) (KBr)S8                                                              |           |
| 1.13. 2-Ethyl-2-(5-hydroxypentyl)-5,5-dimethyl-4-(pyrrolidino)-2,5-dihydroimidazol-1-oxyl (19b) (KBr)S8                                                              |           |
| 1.14. 2-(3-(1H-Imidazole-1-carbonyloxy)propyl)-2-ethyl-5,5-dimethyl-4-(pyrrolidino)-2,5-dihydro-1H-imidazol-1-oxyl (20a) (KBr) .....                                 | S8        |
| 1.15. 2-(5-(1H-Imidazole-1-carbonyloxy)pentyl)-2-ethyl-5,5-dimethyl-4-(pyrrolidino)-2,5-dihydro-1H-imidazol-1-oxyl (20b) (KBr).....                                  | S9        |
| 1.16. 2-(3-(3-(Diethylamino)propylcarbamoyloxy)propyl)-2-ethyl-5,5-dimethyl-4-(pyrrolidino)-2,5-dihydro-1H-imidazol-1-oxyl (21) (KBr).....                           | S9        |
| 1.17. 2-(3-Carboxypropyl)-2-ethyl-5,5-dimethyl-4-(pyrrolidino)-2,5-dihydro-1H-imidazol-1-oxyl (22) (neat) .....                                                      | S9        |
| 1.18. 2-(2-(1,3-Dioxolan-2-yl)ethyl)-2-ethyl-5,5-dimethyl-4-(pyrrolidin-1-yl)-2,5-dihydroimidazol-1-oxyl (23) (neat) .....                                           | S10       |
| 1.19. 2-ethyl-5,5-dimethyl-2-(3-oxopropyl)-4-(pyrrolidin-1-yl)-2,5-dihydro-1H-imidazol-1-oxyl (24) (neat) .....                                                      | S10       |

|                                                                                                                                                                                                                                                                             |            |
|-----------------------------------------------------------------------------------------------------------------------------------------------------------------------------------------------------------------------------------------------------------------------------|------------|
| 1.20. 2-(2-carboxyethyl)-2-ethyl-5,5-dimethyl-4-(pyrrolidin-1-yl)-2,5-dihydro-1H-imidazol-1-oxyl ( <b>25</b> ) (neat)                                                                                                                                                       | S10        |
| 1.21. 1-(4-(1,3-dioxolan-2-yl)phenyl)-N-methylmethanamine ( <b>26</b> ) (neat)                                                                                                                                                                                              | S11        |
| 1.22. 5-((4-(1,3-dioxolan-2-yl)benzyl)(methyl)amino)-4,4-dimethyl-2-(pyridin-4-yl)-4H-imidazole 3-oxide ( <b>30</b> ) (KBr)                                                                                                                                                 | S11        |
| 1.23. 4-((4-(1,3-dioxolan-2-yl)benzyl)(methyl)amino)-2-ethyl-5,5-dimethyl-2-(pyridin-4-yl)-2,5-dihydro-1H-imidazol-1-oxyl ( <b>31</b> ) (neat)                                                                                                                              | S11        |
| 1.24. 2-ethyl-4-((4-formylbenzyl)(methyl)amino)-5,5-dimethyl-2-(pyridin-4-yl)-2,5-dihydro-1H-imidazol-1-oxyl ( <b>32</b> ) (KBr)                                                                                                                                            | S12        |
| 1.25. 4-((4-carboxybenzyl)(methyl)amino)-2-ethyl-5,5-dimethyl-2-(pyridin-4-yl)-2,5-dihydro-1H-imidazol-1-oxyl ( <b>33</b> ) (KBr)                                                                                                                                           | S12        |
| 1.26. 2-ethyl-4-((4-(hydroxymethyl)benzyl)(methyl)amino)-5,5-dimethyl-2-(pyridin-4-yl)-2,5-dihydro-1H-imidazol-1-oxyl ( <b>34</b> ) (KBr)                                                                                                                                   | S12        |
| 1.27. 4-((4-(((2,5-dioxopyrrolidin-1-yl)oxy)carbonyl)benzyl)(methyl)amino)-2-ethyl-5,5-dimethyl-2-(pyridin-4-yl)-2,5-dihydro-1H-imidazol-1-oxyl ( <b>35</b> ) (KBr)                                                                                                         | S13        |
| <b>2. <sup>1</sup>H NMR spectra</b>                                                                                                                                                                                                                                         | <b>S13</b> |
| 2.1. Tetraisopropyl but-3-yne-1,1-diylidiphosphonate( <b>6</b> ) (400 MHz, CDCl <sub>3</sub> )                                                                                                                                                                              | S13        |
| 2.2. 2-(4-((4-(2,2-Bis(diisopropoxyphosphoryl)ethyl)-1H-1,2,3-triazol-1-yl)methyl)phenyl)-2,5,5-triethyl-4-pyrrolidino-2,5-dihydro-1H-imidazol-1-oxyl ( <b>7</b> ) (300 MHz; CD <sub>3</sub> OD–CDCl <sub>3</sub> , reduced with Zn in ND <sub>4</sub> Cl/D <sub>2</sub> O) | S14        |
| 2.3. 2-(4-Carboxyphenyl)-2,5,5-triethyl-4-pyrrolidino-2,5-dihydro-1H-imidazol-1-oxyl ( <b>12</b> ) (400 MHz; CD <sub>3</sub> OD–CDCl <sub>3</sub> , reduced with PhSH)                                                                                                      | S14        |
| 2.4. 2-(4-(Ethoxycarbonyl)phenyl)-2,5,5-triethyl-4-pyrrolidino-2,5-dihydro-1H-imidazol-1-oxyl ( <b>14</b> ) (300 MHz; CDCl <sub>3</sub> –CD <sub>3</sub> OD, reduced with Zn/CF <sub>3</sub> COOH in CD <sub>3</sub> OD, 65 °C)                                             | S15        |
| 2.5. 2-(4-((3-Carboxypropanoyloxy)methyl)phenyl)-2,5,5-triethyl-4-pyrrolidino-2,5-dihydro-1H-imidazol-1-oxyl ( <b>16</b> ) (300 MHz; CDCl <sub>3</sub> – CD <sub>3</sub> OD, reduced with Zn/CF <sub>3</sub> COOH in CD <sub>3</sub> OD, 65 °C)                             | S15        |
| 2.6. 2-Allyl-2-ethyl-5,5-dimethyl-4-(pyrrolidino)-2,5-dihydroimidazol-1-oxyl ( <b>18a</b> ) (400 MHz; CD <sub>3</sub> OD, reduced with N <sub>2</sub> D <sub>4</sub> )                                                                                                      | S16        |
| 2.7. 2-Ethyl-5,5-dimethyl-2-(pent-4-enyl)-4-(pyrrolidino)-2,5-dihydroimidazol-1-oxyl ( <b>18b</b> ) (300 MHz; CDCl <sub>3</sub> – CD <sub>3</sub> OD, reduced with Zn/CF <sub>3</sub> COOH in CD <sub>3</sub> OD, 65 °C)                                                    | S16        |
| 2.8. 2-Ethyl-2-(3-hydroxypropyl)-5,5-dimethyl-4-(pyrrolidino)-2,5-dihydroimidazol-1-oxyl ( <b>19a</b> ) (400 MHz; CD <sub>3</sub> OD, reduced with N <sub>2</sub> D <sub>4</sub> )                                                                                          | S17        |
| 2.9. 2-Ethyl-2-(5-hydroxypentyl)-5,5-dimethyl-4-(pyrrolidino)-2,5-dihydroimidazol-1-oxyl ( <b>19b</b> ) (300 MHz; CDCl <sub>3</sub> –CD <sub>3</sub> OD, reduced with Zn/CF <sub>3</sub> COOH in CD <sub>3</sub> OD, 65 °C)                                                 | S17        |
| 2.10. 2-(3-(3-(Diethylamino)propylcarbamoyloxy)propyl)-2-ethyl-5,5-dimethyl-4-(pyrrolidino)-2,5-dihydro-1H-imidazol-1-oxyl ( <b>21</b> ) (300 MHz; CDCl <sub>3</sub> – CD <sub>3</sub> OD, reduced with Zn/CF <sub>3</sub> COOH in CD <sub>3</sub> OD, 65 °C)               | S18        |
| 2.11. 2-(2-carboxyethyl)-2-ethyl-5,5-dimethyl-4-(pyrrolidin-1-yl)-2,5-dihydro-1H-imidazol-1-oxyl ( <b>25</b> ) (300 MHz; CDCl <sub>3</sub> –CD <sub>3</sub> OD, reduced with Zn/CF <sub>3</sub> COOH in CD <sub>3</sub> OD, 65 °C)                                          | S18        |
| 2.12. 1-(4-(1,3-dioxolan-2-yl)phenyl)-N-methylmethanamine ( <b>26</b> ) (300 MHz; CDCl <sub>3</sub> )                                                                                                                                                                       | S19        |
| 2.13. 5-((4-(1,3-dioxolan-2-yl)benzyl)(methyl)amino)-4,4-dimethyl-2-(pyridin-4-yl)-4H-imidazole 3-oxide ( <b>30</b> ) (400 MHz; CDCl <sub>3</sub> )                                                                                                                         | S19        |

|                                                                                                                                                                                                                                                     |            |
|-----------------------------------------------------------------------------------------------------------------------------------------------------------------------------------------------------------------------------------------------------|------------|
| 2.14. 2-Ethyl-4-((4-(hydroxymethyl)benzyl)(methyl)amino)-5,5-dimethyl-2-(pyridin-4-yl)-2,5-dihydroimidazol-1-oxyl ( <b>34</b> ) (400 MHz; CDCl <sub>3</sub> , CD <sub>3</sub> OD, reduced with Zn/CF <sub>3</sub> COOH in CD <sub>3</sub> OD) ..... | S20        |
| <b>3. <sup>13</sup>C NMR spectra .....</b>                                                                                                                                                                                                          | <b>S20</b> |
| 3.1. Tetraisopropyl but-3-yne-1,1-diylidiphosphonate( <b>6</b> )(75 MHz, CDCl <sub>3</sub> ).....                                                                                                                                                   | S20        |
| 3.2. 1-(4-(1,3-dioxolan-2-yl)phenyl)-N-methylmethanamine ( <b>26</b> ) (75 MHz; CDCl <sub>3</sub> ) .....                                                                                                                                           | S21        |
| 3.3. 5-((4-(1,3-dioxolan-2-yl)benzyl)(methyl)amino)-4,4-dimethyl-2-(pyridin-4-yl)-4H-imidazole 3-oxide ( <b>30</b> ) (75 MHz; CDCl <sub>3</sub> ) .....                                                                                             | S21        |
| <b>4. Titration data. ....</b>                                                                                                                                                                                                                      | <b>S22</b> |
| 4.1. 2-(4-(Azidomethyl)phenyl)-2,5,5-triethyl-4-pyrrolidino-2,5-dihydro-1H-imidazol-1-oxyl ( <b>5</b> ) .....                                                                                                                                       | S22        |
| 4.2. 2-(4-((4-(2,2-Bis(diisopropoxyphosphoryl)ethyl)-1H-1,2,3-triazol-1-yl)methyl)phenyl)-2,5,5-triethyl-4-pyrrolidino-2,5-dihydro-1H-imidazol-1-oxyl ( <b>7</b> ).....                                                                             | S22        |
| 4.3. 2,5,5-Triethyl-2-(4-ethynylphenyl)-4-pyrrolidino-2,5-dihydro-1H-imidazol-1-oxyl ( <b>11</b> ) .....                                                                                                                                            | S23        |
| 4.4 2-(4-Carboxyphenyl)-2,5,5-triethyl-4-pyrrolidino-2,5-dihydro-1H-imidazol-1-oxyl ( <b>12</b> ).....                                                                                                                                              | S23        |
| 4.5. 2-(4-((2,5-Dioxopyrrolidinooxy)carbonyl)phenyl)-2,5,5-triethyl-4-pyrrolidino-2,5-dihydro-1H-imidazol-1-oxyl ( <b>15</b> ) .....                                                                                                                | S24        |
| 4.6. 2-(4-((3-Carboxypropanoyloxy)methyl)phenyl)-2,5,5-triethyl-4-pyrrolidino-2,5-dihydro-1H-imidazol-1-oxyl ( <b>16</b> ) .....                                                                                                                    | S24        |
| 4.7. 2-Allyl-2-ethyl-5,5-dimethyl-4-(pyrrolidino)-2,5-dihydroimidazol-1-oxyl ( <b>18a</b> ) .....                                                                                                                                                   | S25        |
| 4.8. 2-Ethyl-5,5-dimethyl-2-(pent-4-enyl)-4-(pyrrolidino)-2,5-dihydroimidazol-1-oxyl ( <b>18b</b> ) .....                                                                                                                                           | S25        |
| 4.9. 2-Ethyl-2-(3-hydroxypropyl)-5,5-dimethyl-4-(pyrrolidino)-2,5-dihydroimidazol-1-oxyl ( <b>19a</b> ).....                                                                                                                                        | S26        |
| 4.10. 2-Ethyl-2-(5-hydroxypentyl)-5,5-dimethyl-4-(pyrrolidino)-2,5-dihydroimidazol-1-oxyl ( <b>19b</b> ) .....                                                                                                                                      | S26        |
| 4.11. 2-(3-(1H-Imidazole-1-carbonyloxy)propyl)-2-ethyl-5,5-dimethyl-4-(pyrrolidino)-2,5-dihydro-1H-imidazol-1-oxyl ( <b>20a</b> ).....                                                                                                              | S27        |
| 4.12. 2-(3-(3-(Diethylamino)propylcarbonyloxy)propyl)-2-ethyl-5,5-dimethyl-4-(pyrrolidino)-2,5-dihydro-1H-imidazol-1-oxyl ( <b>21</b> ) .....                                                                                                       | S27        |
| 4.13. 2-(3-Carboxypropyl)-2-ethyl-5,5-dimethyl-4-(pyrrolidino)-2,5-dihydro-1H-imidazol-1-oxyl ( <b>22</b> ).....                                                                                                                                    | S28        |
| 4.15. 2-(2-carboxyethyl)-2-ethyl-5,5-dimethyl-4-(pyrrolidin-1-yl)-2,5-dihydro-1H-imidazol-1-oxyl ( <b>25</b> ).....                                                                                                                                 | S29        |
| 4.16. 2-ethyl-4-((4-formylbenzyl)(methyl)amino)-5,5-dimethyl-2-(pyridin-4-yl)-2,5-dihydro-1H-imidazol-1-oxyl ( <b>32</b> ) .....                                                                                                                    | S29        |
| 4.17. 4-((4-carboxybenzyl)(methyl)amino)-2-ethyl-5,5-dimethyl-2-(pyridin-4-yl)-2,5-dihydro-1H-imidazol-1-oxyl ( <b>33</b> ) .....                                                                                                                   | S29        |
| <b>5. X-Ray data for nitroxide 11.....</b>                                                                                                                                                                                                          | <b>S30</b> |

## 1. IR Spectra

### 1.1. 2-(4-(Azidomethyl)phenyl)-2,5,5-triethyl-4-pyrrolidino-2,5-dihydro-1H-imidazol-1-oxyl (5) (KBr)

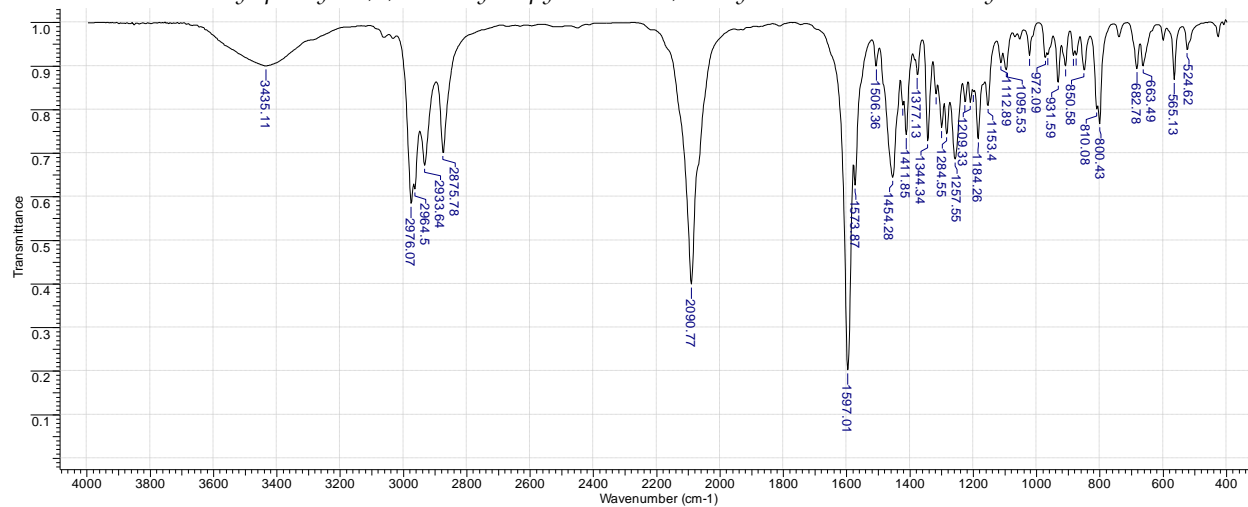

### 1.2. Tetraisopropyl but-3-yne-1,1-diylidphosphonate (6) (neat)

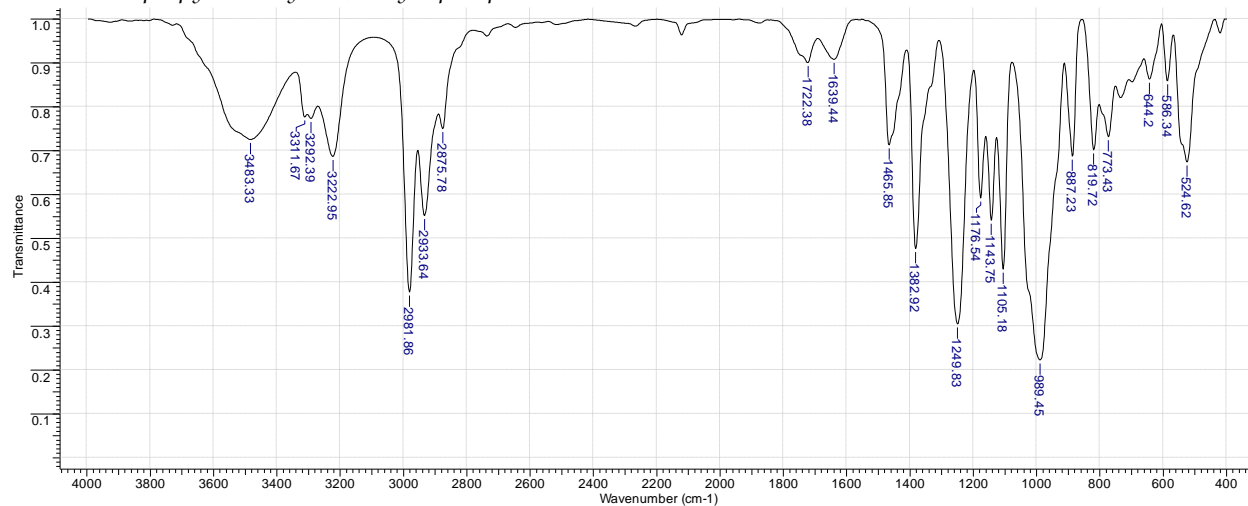

### 1.3. 2-(4-((4-(2,2-Bis(diisopropoxyphosphoryl)ethyl)-1H-1,2,3-triazol-1-yl)methyl)phenyl)-2,5,5-triethyl-4-pyrrolidino-2,5-dihydro-1H-imidazol-1-oxyl(7) (neat)

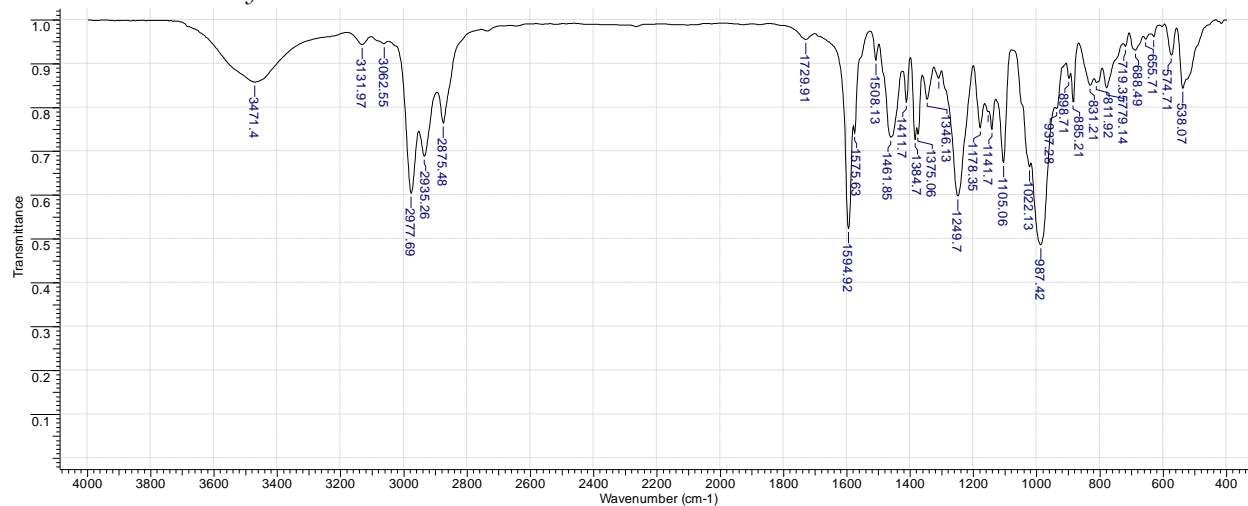

1.4. 2,5,5-Triethyl-2-(4-formylphenyl)-4-pyrrolidino-2,5-dihydro-1H-imidazol-1-oxyl (9) (KBr)

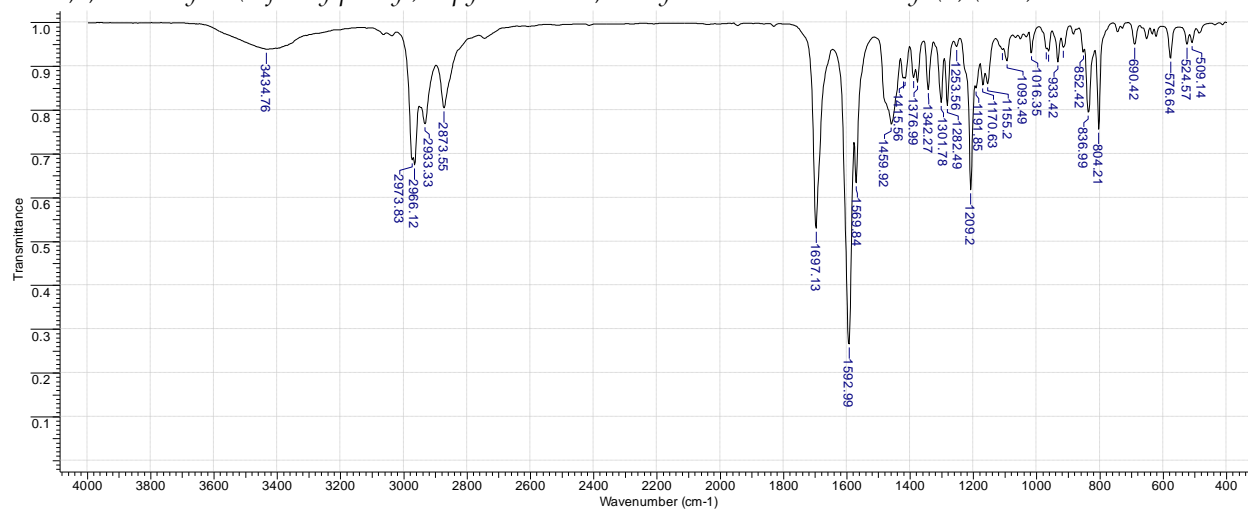

1.5. 2,5,5-Triethyl-2-(4-ethynylphenyl)-4-pyrrolidino-2,5-dihydro-1H-imidazol-1-oxyl (11) (KBr)

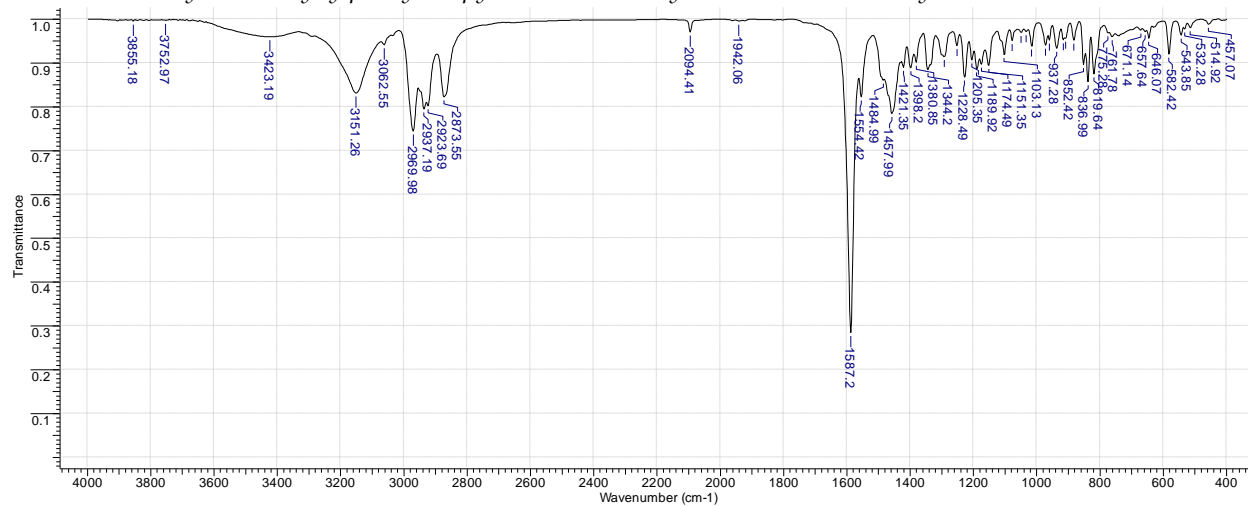

1.6. 2-(4-Carboxyphenyl)-2,5,5-triethyl-4-pyrrolidino-2,5-dihydro-1H-imidazol-1-oxyl (12)(KBr)

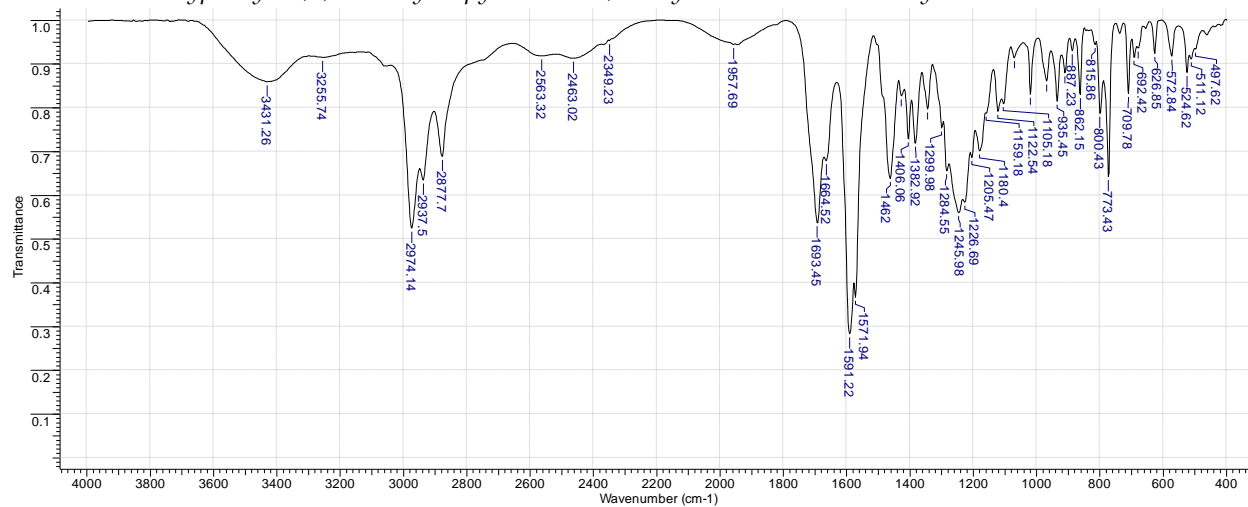

1.7. 2-(4-(Ethoxycarbonyl)phenyl)-2,5,5-triethyl-4-pyrrolidino-2,5-dihydro-1H-imidazol-1-oxyl (**14**) (KBr)

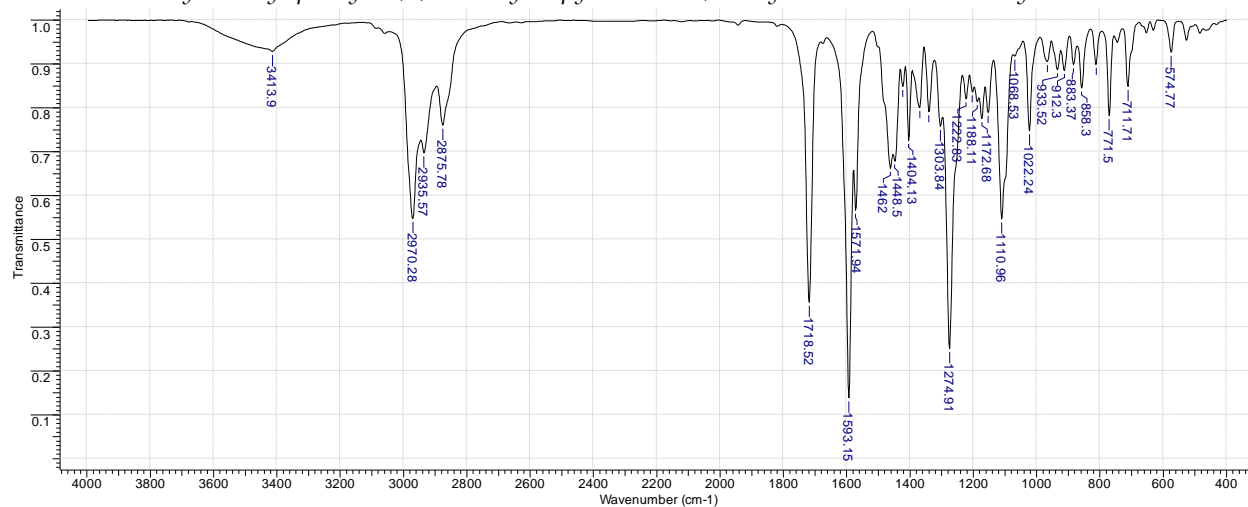

1.8. 2-(4-((2,5-Dioxypyrrolidinooxy)carbonyl)phenyl)-2,5,5-triethyl-4-pyrrolidino-2,5-dihydro-1H-imidazol-1-oxyl (**15**) (KBr)

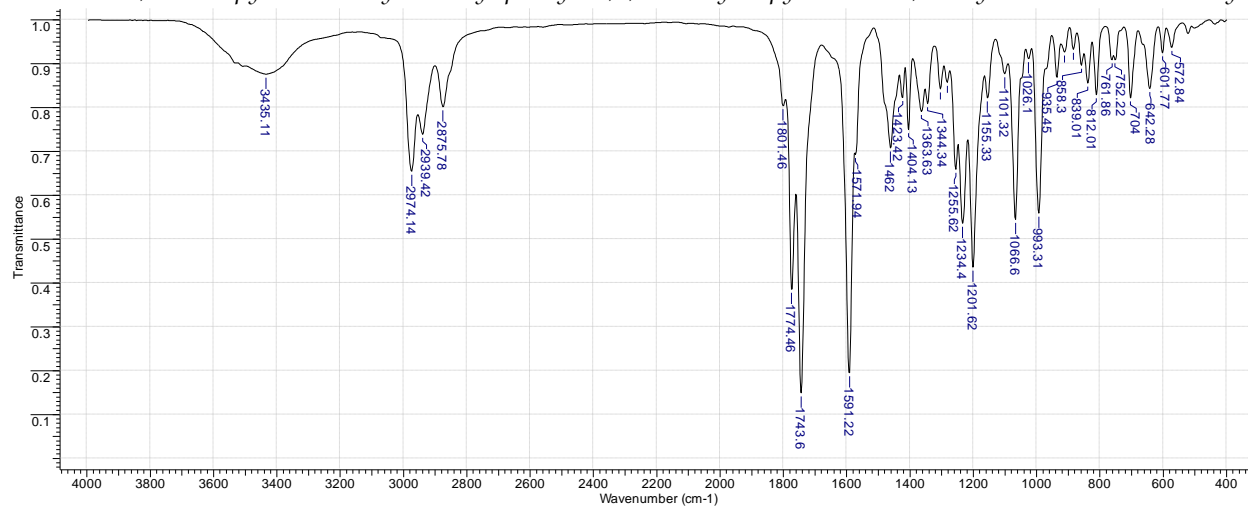

1.9. 2-(4-((3-Carboxypropanoyloxy)methyl)phenyl)-2,5,5-triethyl-4-pyrrolidino-2,5-dihydro-1H-imidazol-1-oxyl (**16**) (KBr)

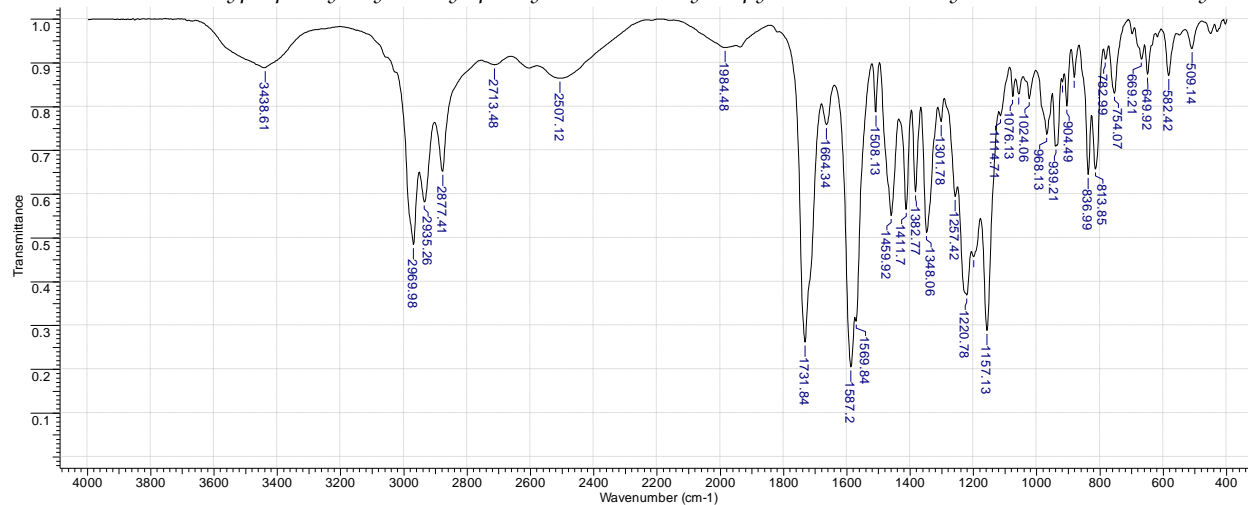

1.10. 2-Allyl-2-ethyl-5,5-dimethyl-4-(pyrrolidino)-2,5-dihydroimidazol-1-oxyl (**18a**) (KBr)

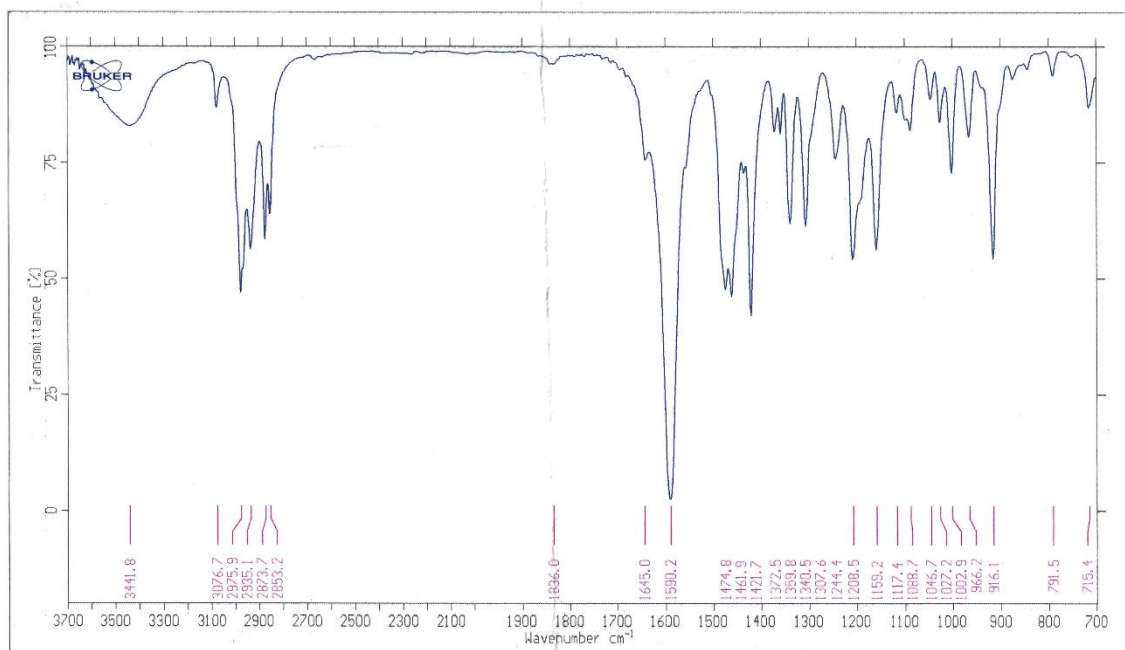

1.11. 2-Ethyl-5,5-dimethyl-2-(pent-4-enyl)-4-(pyrrolidino)-2,5-dihydroimidazol-1-oxyl (**18b**) (KBr).

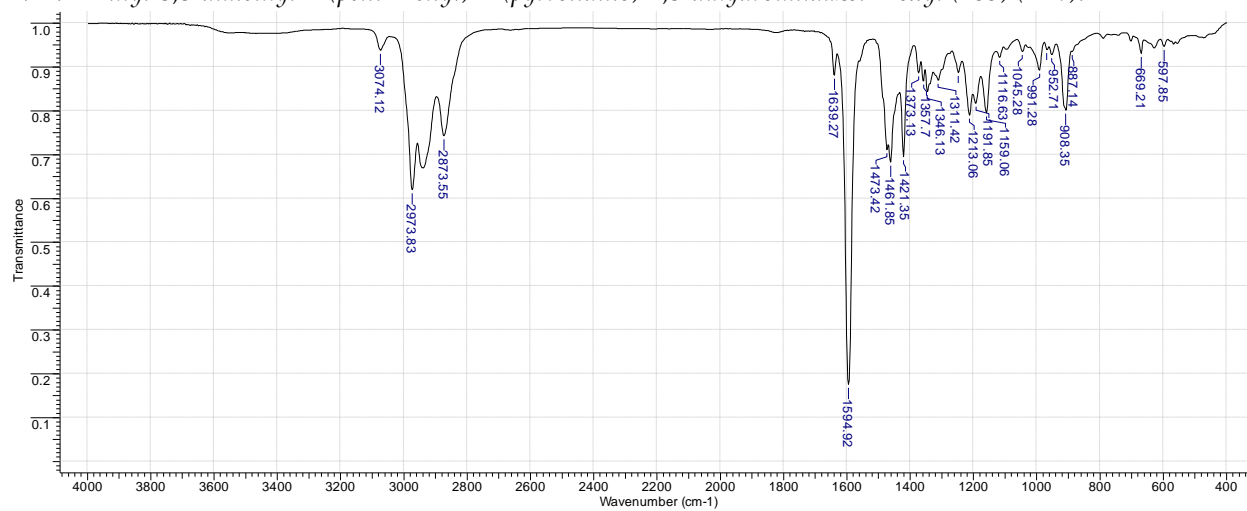

1.12. 2-Ethyl-2-(3-hydroxypropyl)-5,5-dimethyl-4-(pyrrolidino)-2,5-dihydroimidazol-1-oxyl (19a) (KBr)

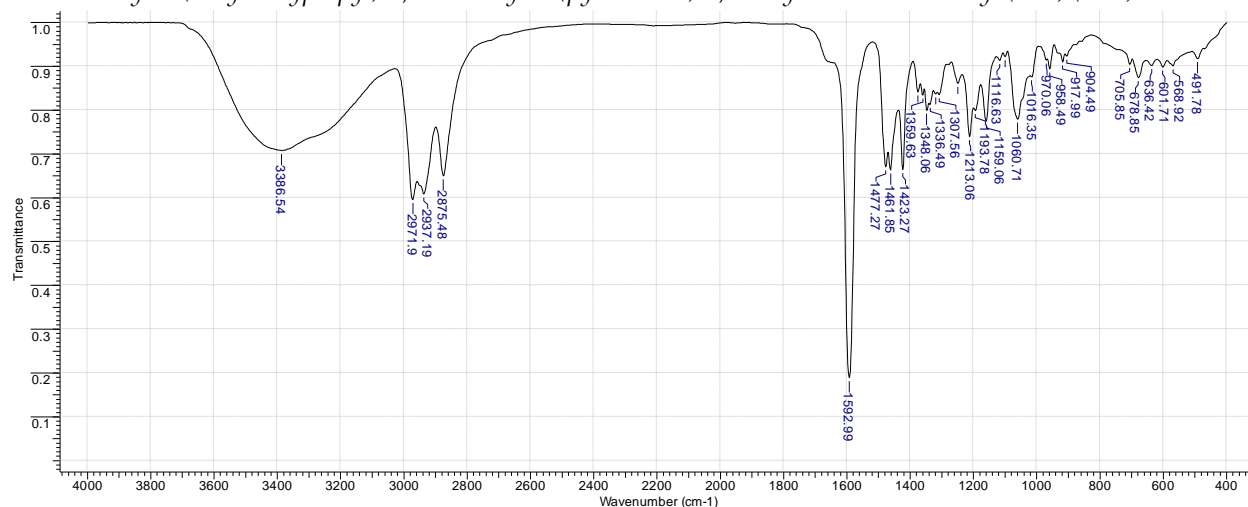

1.13. 2-Ethyl-2-(5-hydroxypentyl)-5,5-dimethyl-4-(pyrrolidino)-2,5-dihydroimidazol-1-oxyl (19b) (KBr)

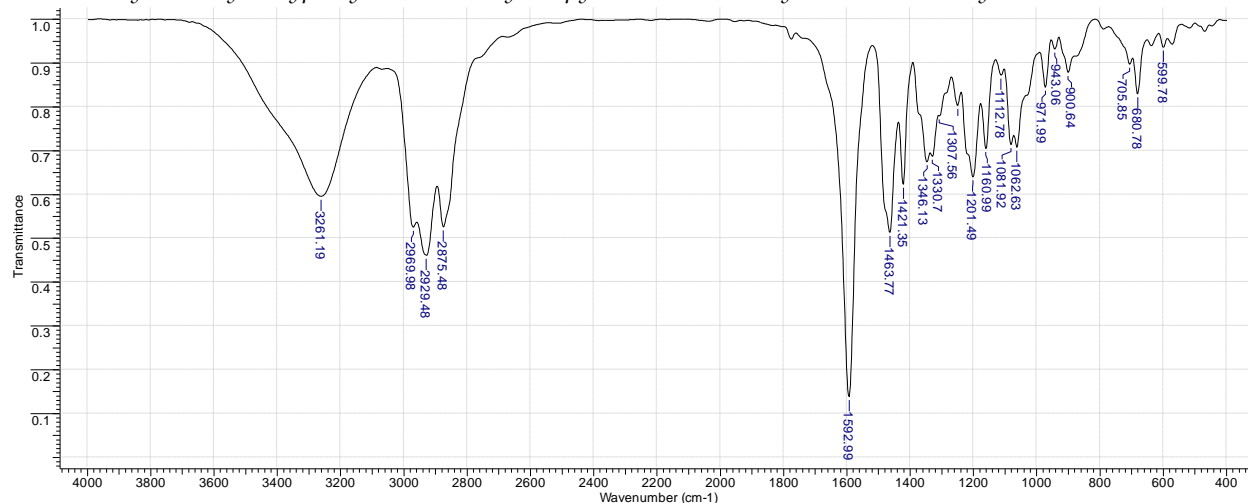

1.14. 2-(3-(1H-Imidazole-1-carboxyloxy)propyl)-2-ethyl-5,5-dimethyl-4-(pyrrolidino)-2,5-dihydro-1H-imidazol-1-oxyl (20a) (KBr)

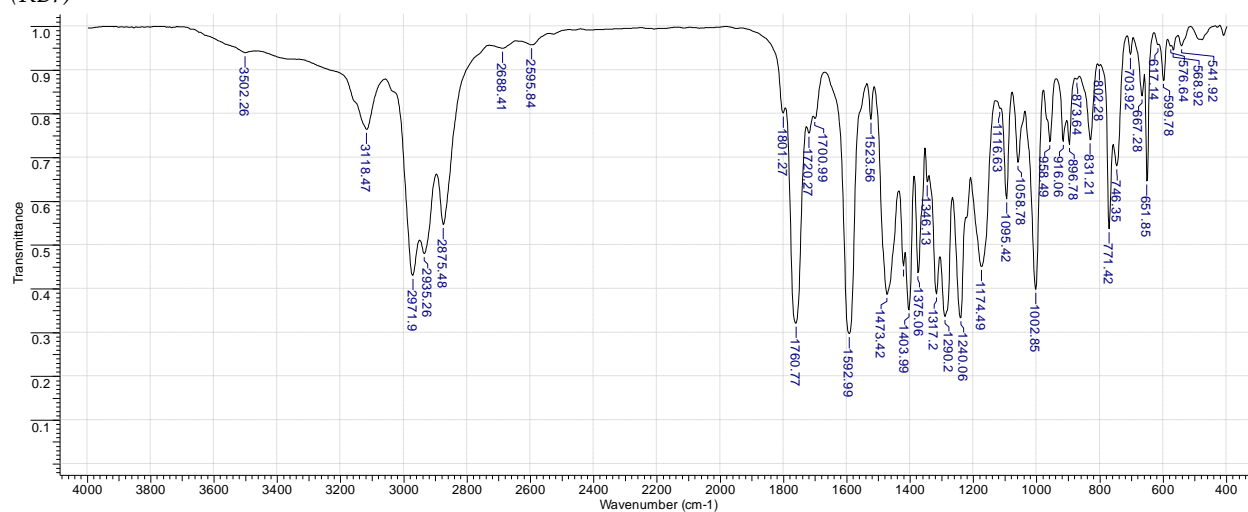



1.15. 2-(5-(1H-Imidazole-1-carboxyloxy)pentyl)-2-ethyl-5,5-dimethyl-4-(pyrrolidino)-2,5-dihydro-1H-imidazol-1-oxyl (20b) (KBr)

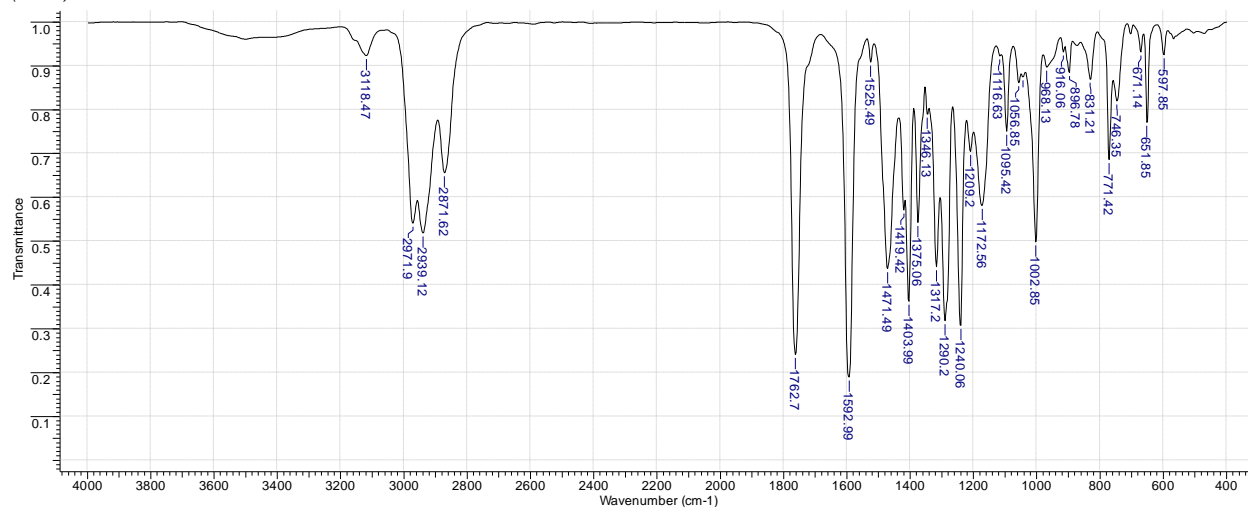

1.16. 2-(3-(3-(Diethylamino)propylcarbamoyloxy)propyl)-2-ethyl-5,5-dimethyl-4-(pyrrolidino)-2,5-dihydro-1H-imidazol-1-oxyl (21) (KBr)

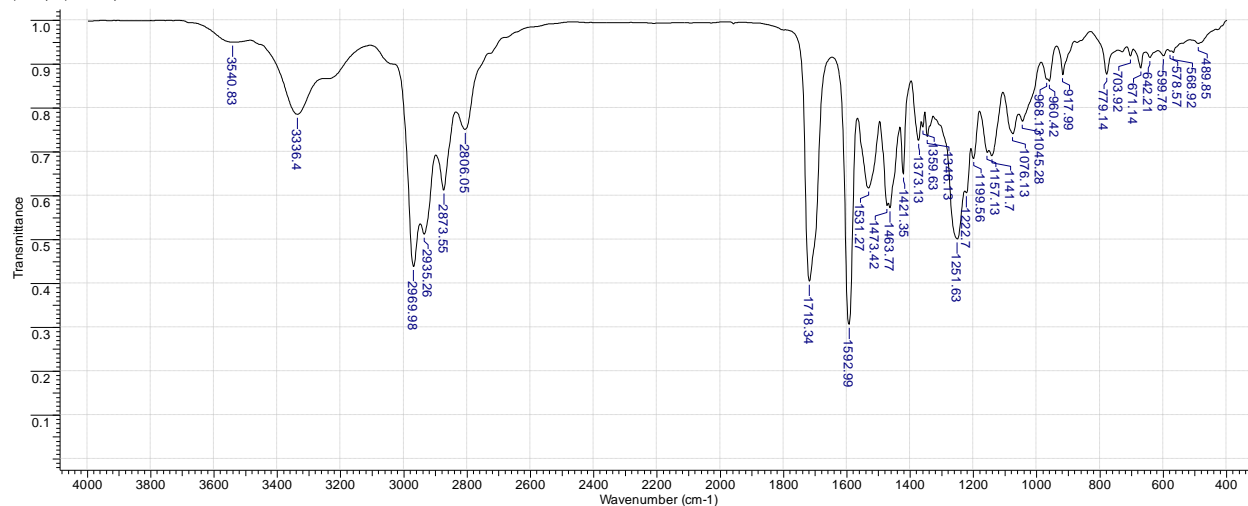

1.17. 2-(3-Carboxypropyl)-2-ethyl-5,5-dimethyl-4-(pyrrolidino)-2,5-dihydro-1H-imidazol-1-oxyl (22) (neat)

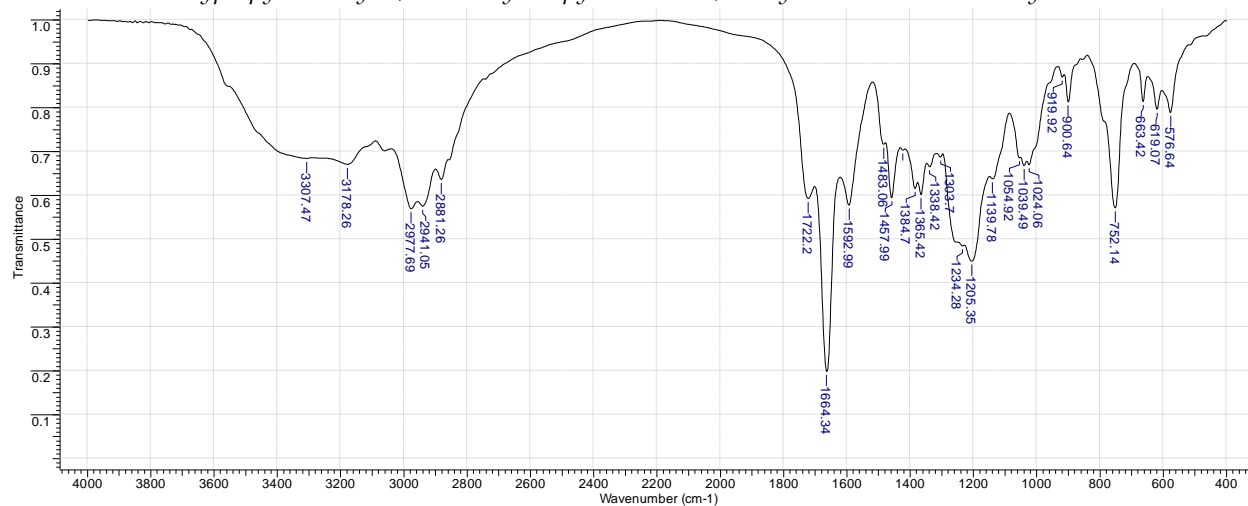

1.18. 2-(2-(1,3-Dioxolan-2-yl)ethyl)-2-ethyl-5,5-dimethyl-4-(pyrrolidin-1-yl)-2,5-dihydroimidazol-1-oxyl (23) (neat)

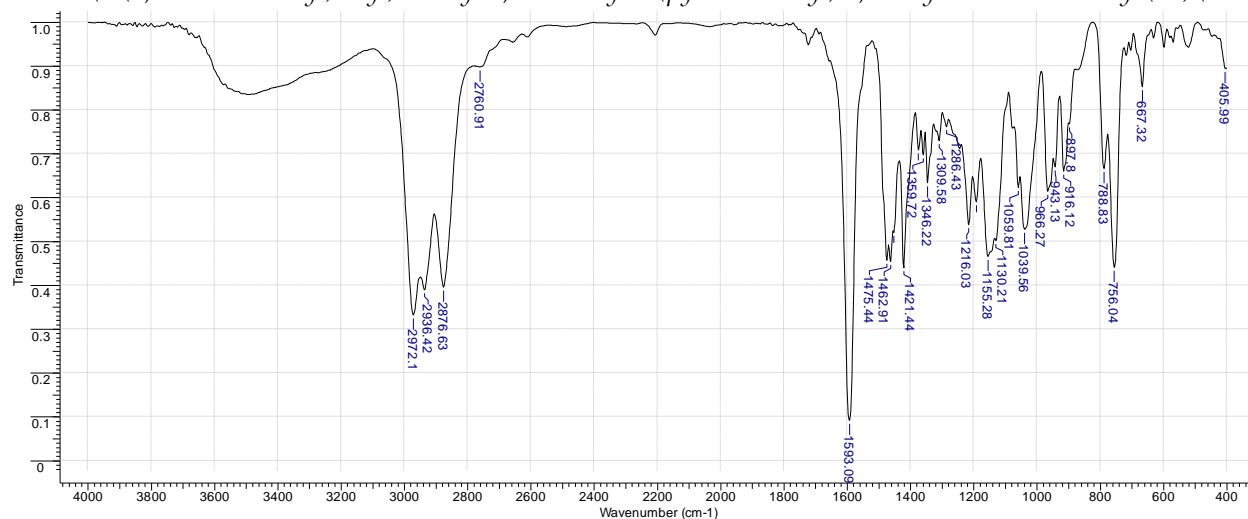

1.19. 2-ethyl-5,5-dimethyl-2-(3-oxopropyl)-4-(pyrrolidin-1-yl)-2,5-dihydro-1H-imidazol-1-oxyl (24) (neat)

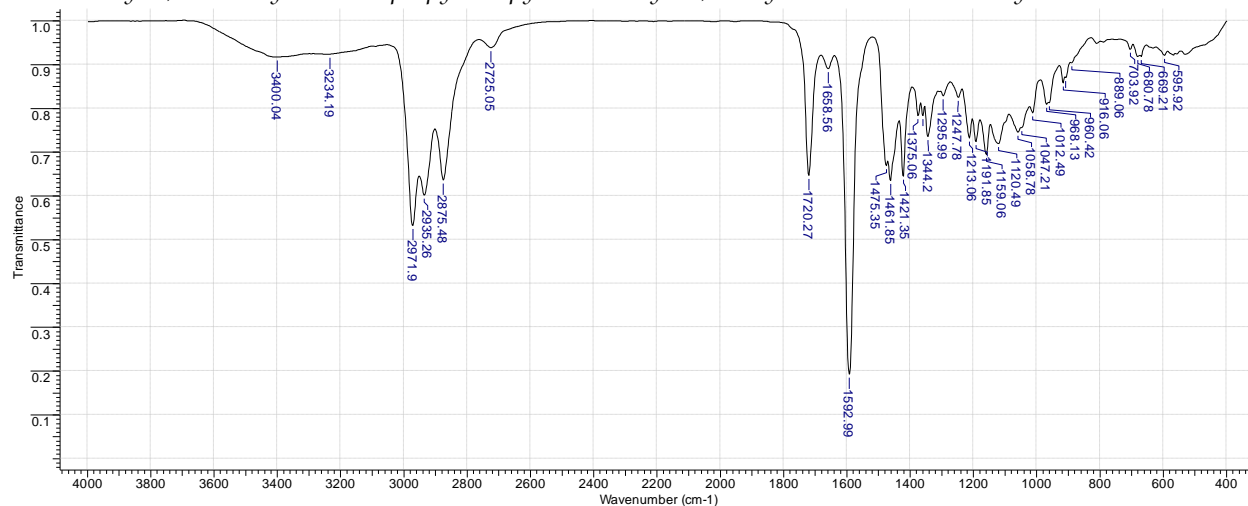

1.20. 2-(2-carboxyethyl)-2-ethyl-5,5-dimethyl-4-(pyrrolidin-1-yl)-2,5-dihydro-1H-imidazol-1-oxyl (25) (neat)

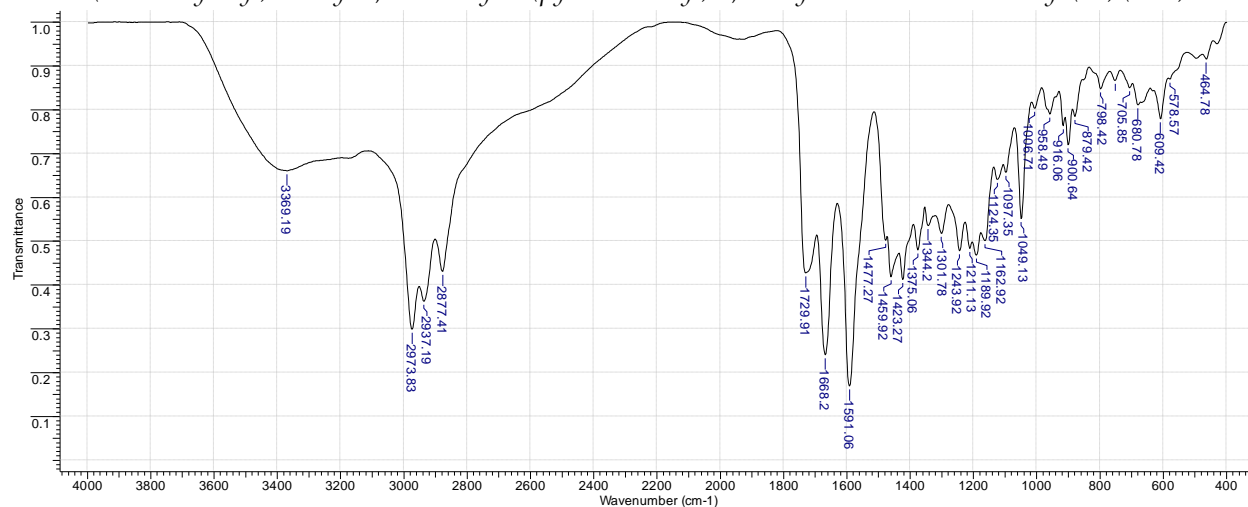

1.21. 1-(4-(1,3-dioxolan-2-yl)phenyl)-N-methylmethanamine (26) (neat)

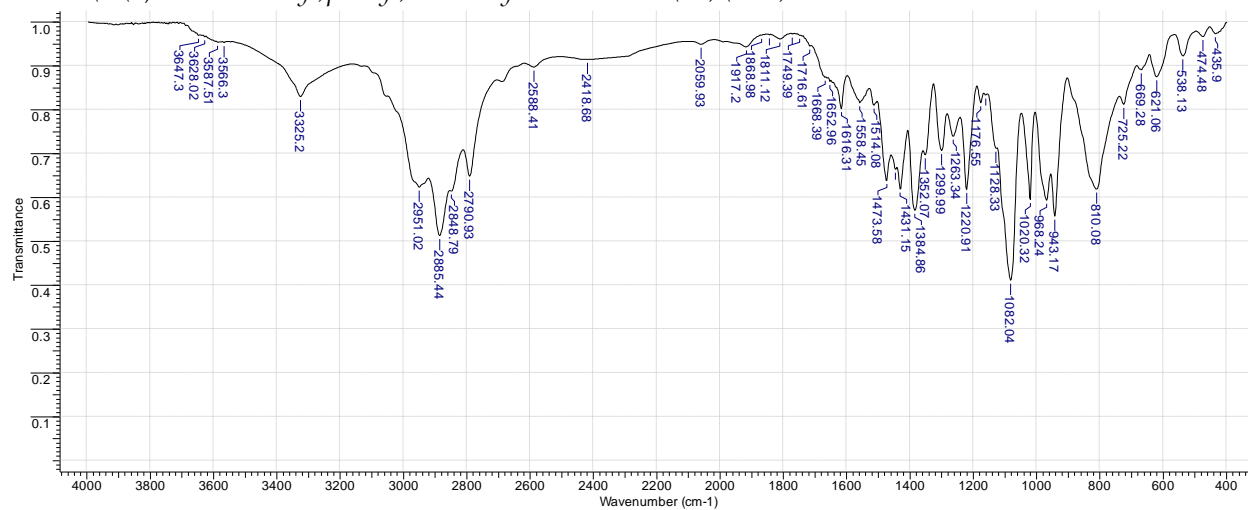

1.22. 5-((4-(1,3-dioxolan-2-yl)benzyl)(methyl)amino)-4,4-dimethyl-2-(pyridin-4-yl)-4H-imidazole 3-oxide (30) (KBr)

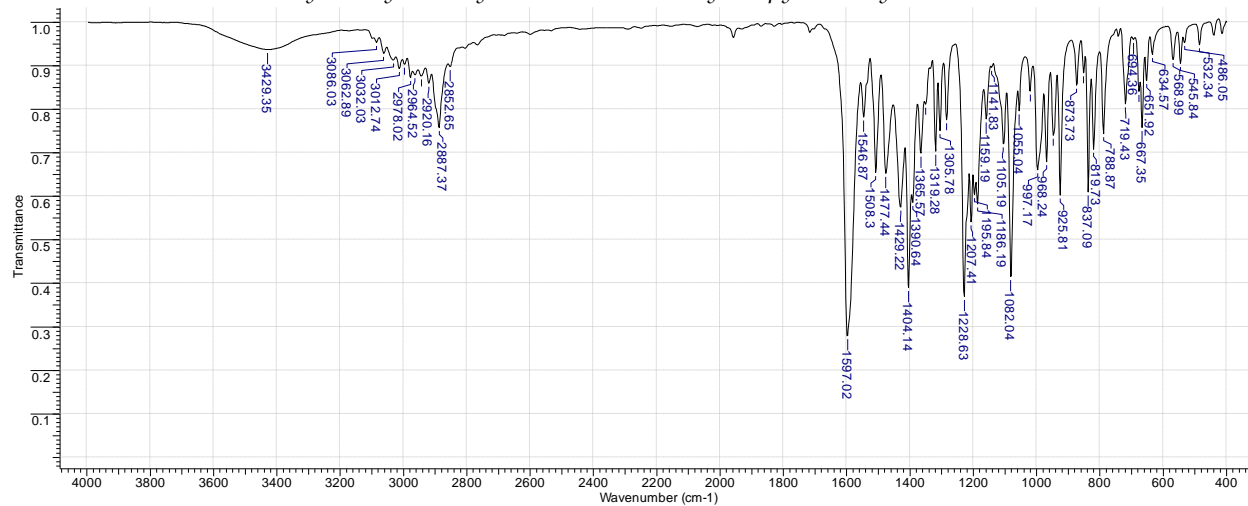

1.23. 4-((4-(1,3-dioxolan-2-yl)benzyl)(methyl)amino)-2-ethyl-5,5-dimethyl-2-(pyridin-4-yl)-2,5-dihydro-1H-imidazol-1-oxyl (31) (neat)

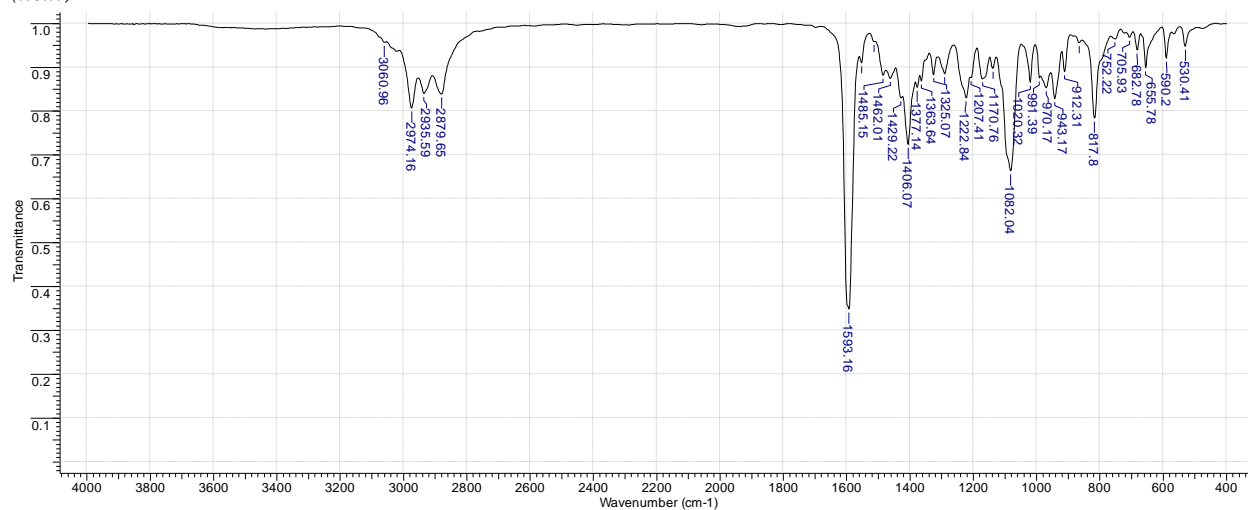

1.24. 2-ethyl-4-((4-formylbenzyl)(methyl)amino)-5,5-dimethyl-2-(pyridin-4-yl)-2,5-dihydro-1H-imidazol-1-oxyl (32) (KBr)

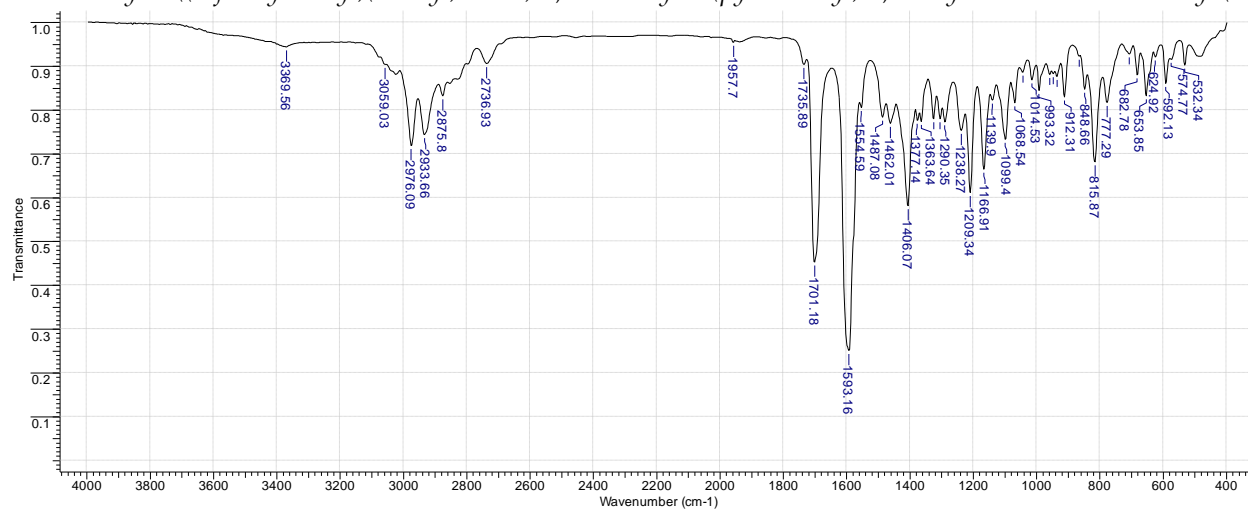

1.25. 4-((4-carboxybenzyl)(methyl)amino)-2-ethyl-5,5-dimethyl-2-(pyridin-4-yl)-2,5-dihydro-1H-imidazol-1-oxyl (33) (KBr)

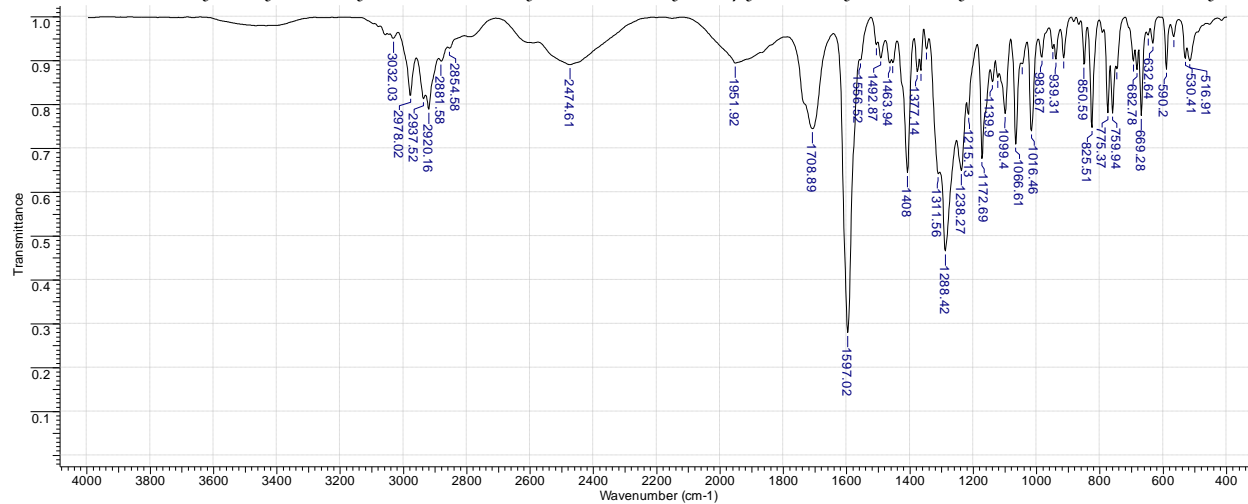

1.26. 2-ethyl-4-((4-(hydroxymethyl)benzyl)(methyl)amino)-5,5-dimethyl-2-(pyridin-4-yl)-2,5-dihydro-1H-imidazol-1-oxyl (34) (KBr)

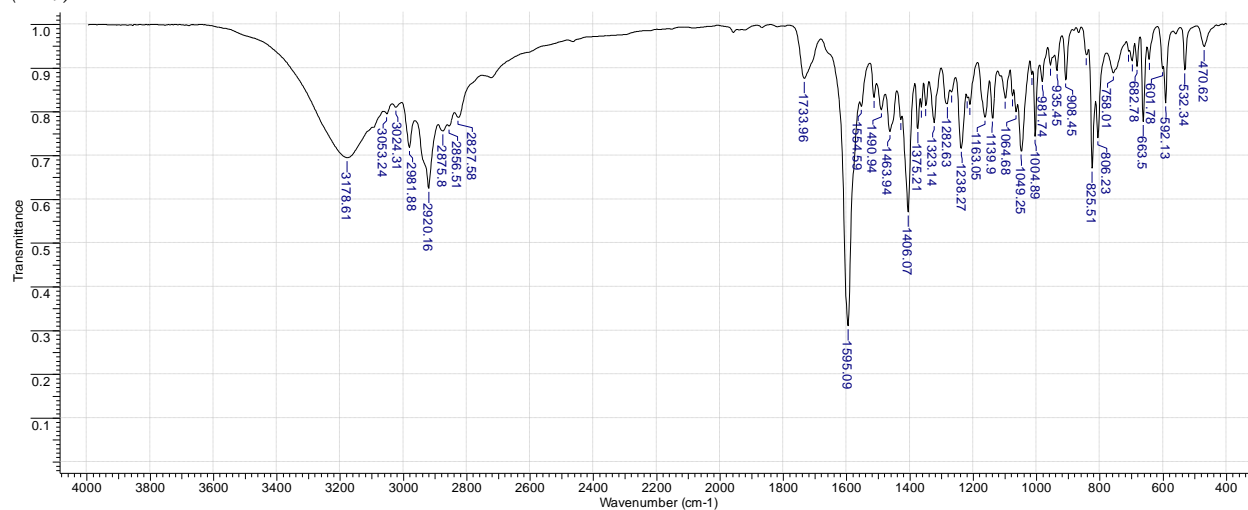

1.27. 4-((4-(((2,5-dioxopyrrolidin-1-yl)oxy)carbonyl)benzyl)(methyl)amino)-2-ethyl-5,5-dimethyl-2-(pyridin-4-yl)-2,5-dihydro-1H-imidazol-1-oxyl (35) (KBr)

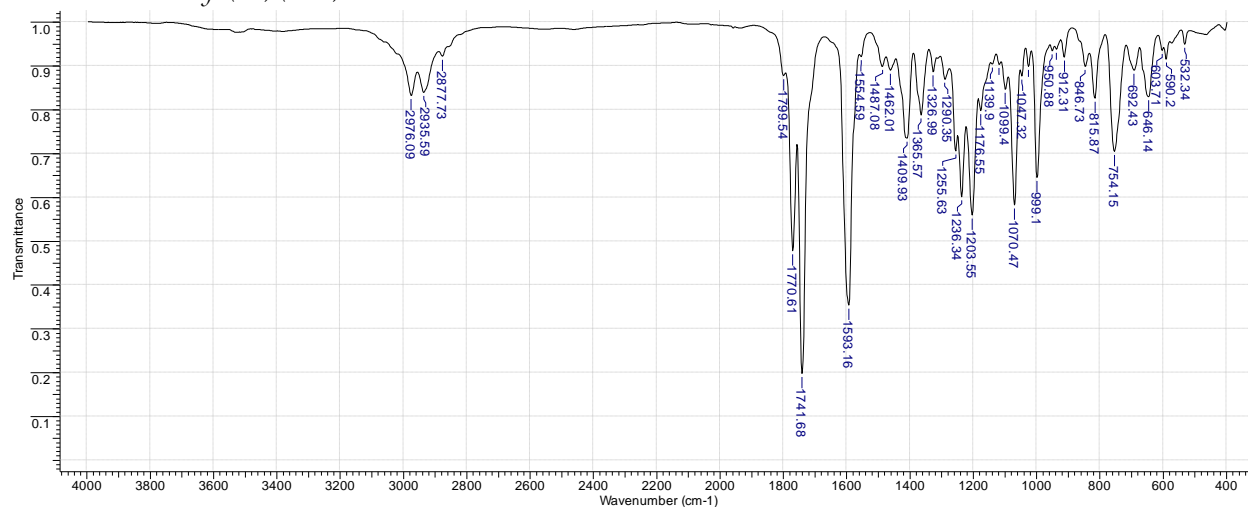

2. <sup>1</sup>H NMR Spectra.

2.1. Tetraisopropyl but-3-yne-1,1-diylidphosphonate(6)(400 MHz, CDCl<sub>3</sub>)

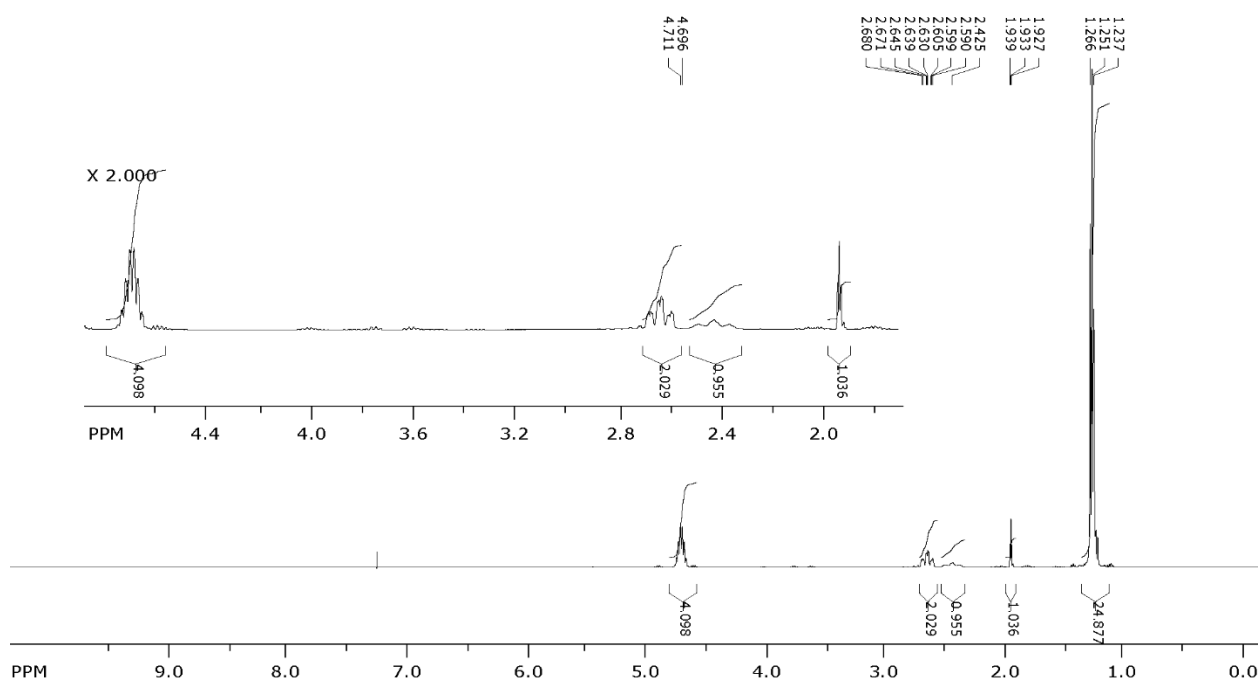

<sup>1</sup>H NMR spectrum (400 MHz, CDCl<sub>3</sub>) of 1,3-bis(4-methylphenyl)propan-2-one. The spectrum shows peaks from 0 to 10 ppm. Key features include a singlet at ~7.6 ppm (aromatic), a singlet at ~4.6 ppm (CH), a singlet at ~3.9 ppm (CH<sub>3</sub>), a multiplet at ~3.3 ppm (CH<sub>2</sub>), a multiplet at ~2.1 ppm (CH<sub>2</sub>), a multiplet at ~1.4 ppm (CH<sub>3</sub>), and a multiplet at ~0.7 ppm (CH<sub>3</sub>). Integration values are shown below the peaks.

| Chemical Shift (ppm) | Integration |
|----------------------|-------------|
| ~7.607               | ~0.925      |
| ~4.691               | ~5.081      |
| ~3.922               | ~4.652      |
| ~3.259               | ~2.413      |
| ~2.858               | ~0.452      |
| ~2.123               | ~2.737      |
| ~1.847               | ~1.270      |
| ~1.468               | ~2.433      |
| ~1.382               | ~2.736      |
| ~1.239               | ~3.728      |
| ~1.039               | ~3.526      |
| ~0.904               | ~3.225      |

[illegible]

2.4. 2-(4-(Ethoxycarbonyl)phenyl)-2,5,5-triethyl-4-pyrrolidino-2,5-dihydro-1H-imidazol-1-oxyl (**14**) (300 MHz; CDCl<sub>3</sub>-CD<sub>3</sub>OD, reduced with Zn/CF<sub>3</sub>COOH in CD<sub>3</sub>OD, 65 °C)

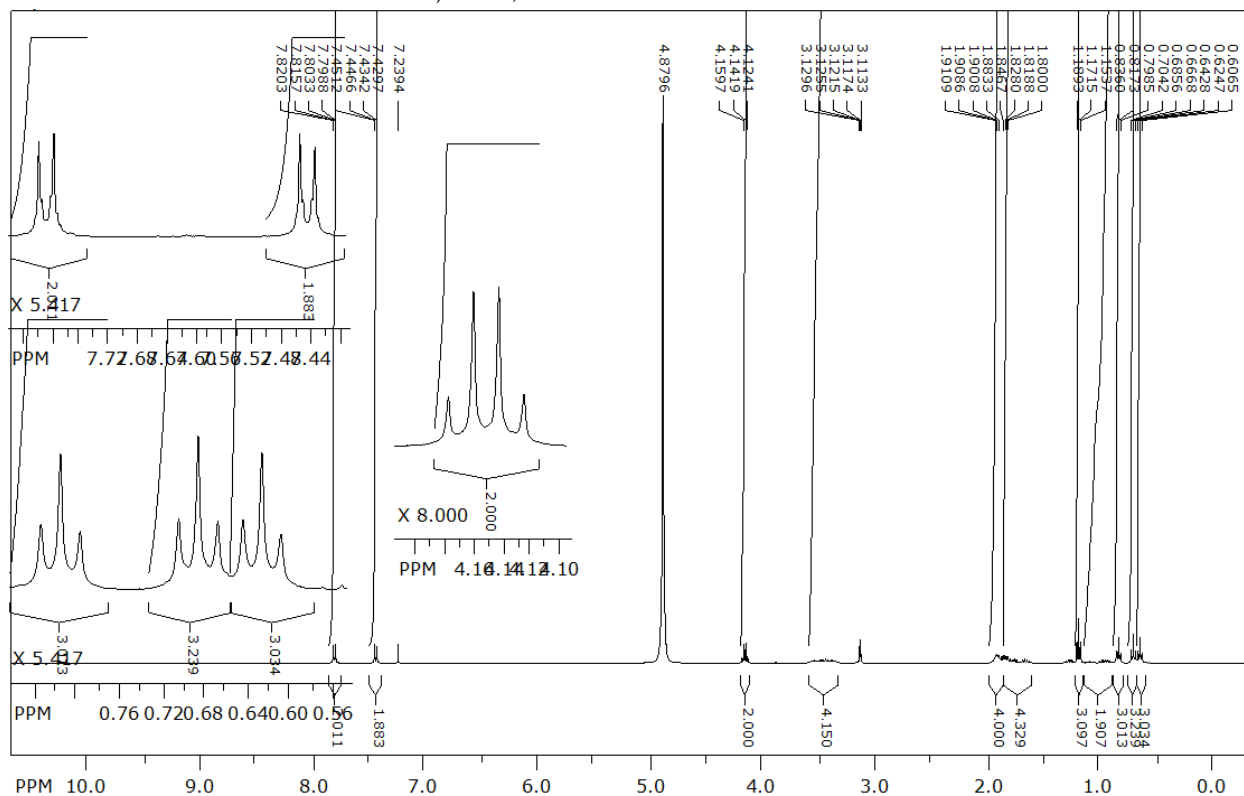

2.5. 2-(4-((3-Carboxypropanoyloxy)methyl)phenyl)-2,5,5-triethyl-4-pyrrolidino-2,5-dihydro-1H-imidazol-1-oxyl (**16**) (300 MHz; CDCl<sub>3</sub> - CD<sub>3</sub>OD, reduced with Zn/CF<sub>3</sub>COOH in CD<sub>3</sub>OD, 65 °C)

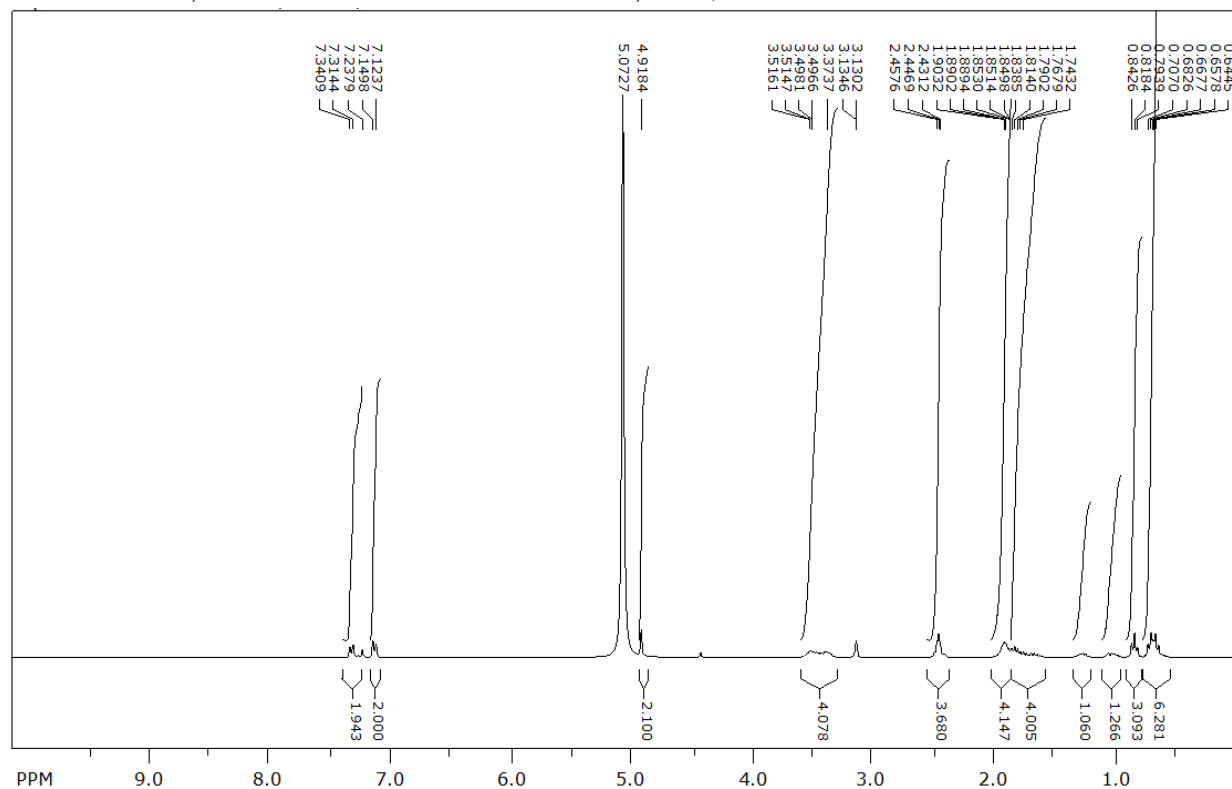

2.6. 2-Allyl-2-ethyl-5,5-dimethyl-4-(pyrrolidino)-2,5-dihydroimidazol-1-oxyl (**18a**) (400 MHz; CD<sub>3</sub>OD, reduced with N<sub>2</sub>D<sub>4</sub>)

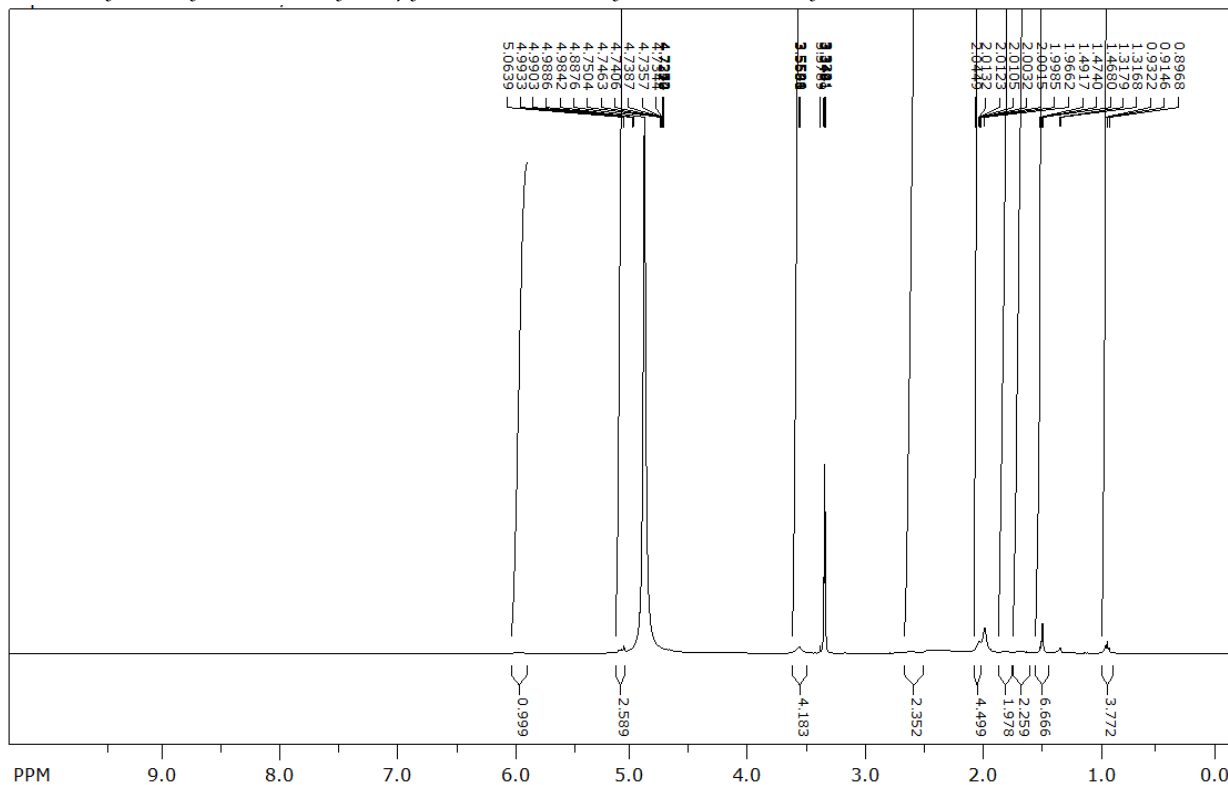

2.7. 2-Ethyl-5,5-dimethyl-2-(pent-4-enyl)-4-(pyrrolidino)-2,5-dihydroimidazol-1-oxyl (**18b**) (300 MHz; CDCl<sub>3</sub> – CD<sub>3</sub>OD, reduced with Zn/CF<sub>3</sub>COOH in CD<sub>3</sub>OD, 65 °C)

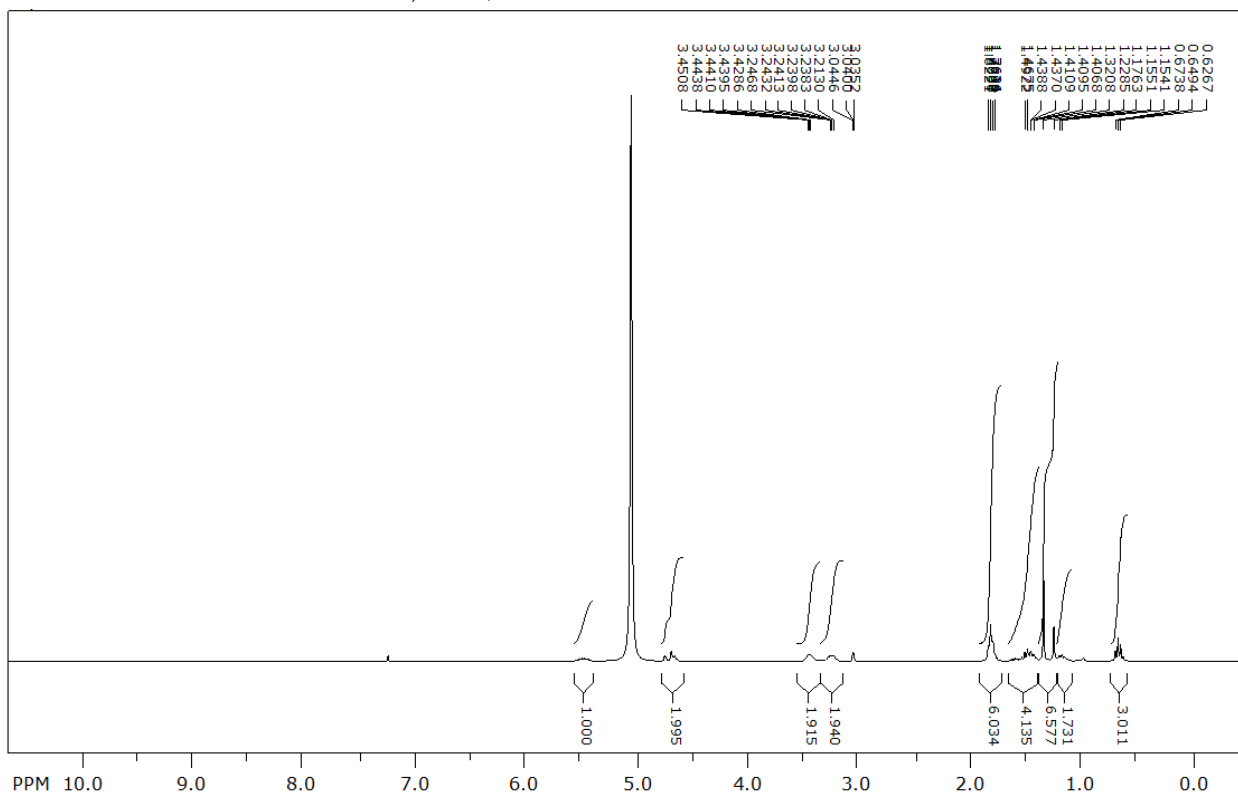



2.8. 2-Ethyl-2-(3-hydroxypropyl)-5,5-dimethyl-4-(pyrrolidino)-2,5-dihydroimidazol-1-oxyl (**19a**) (400 MHz; CD<sub>3</sub>OD, reduced with N<sub>2</sub>D<sub>4</sub>)

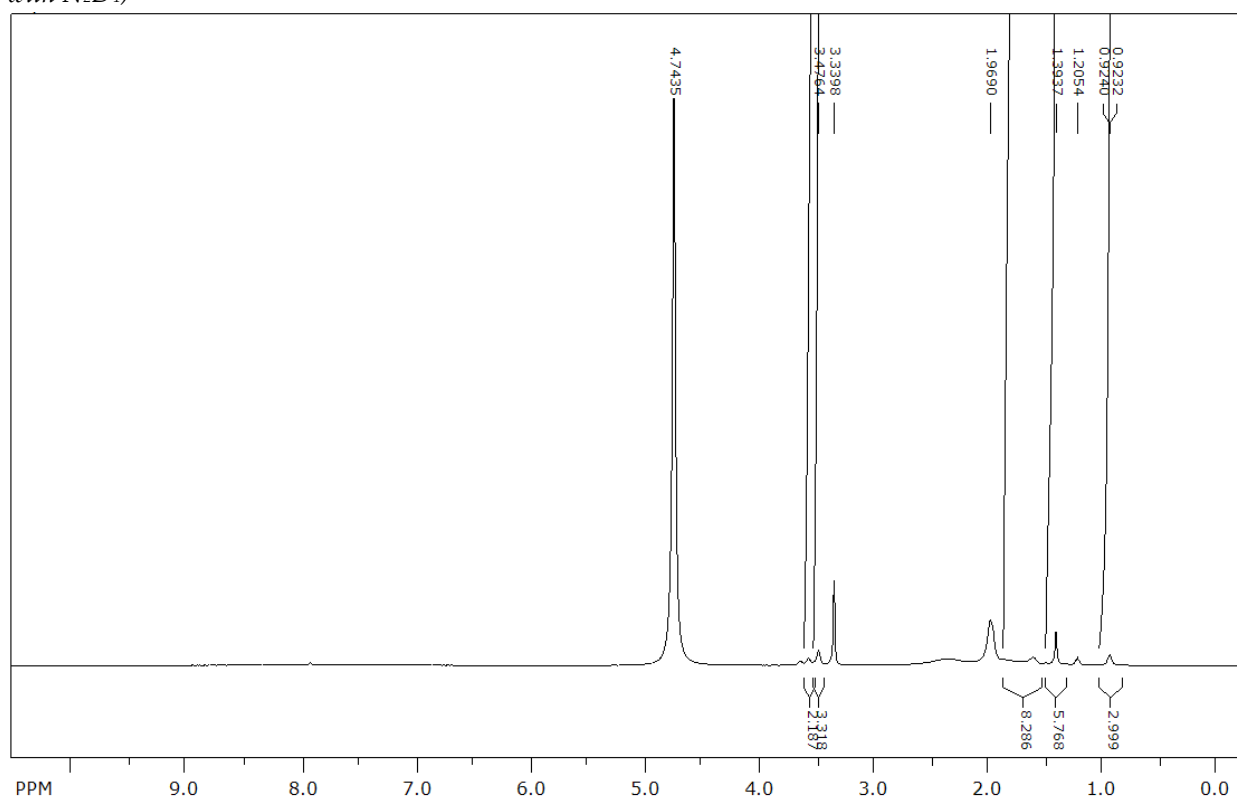

2.9. 2-Ethyl-2-(5-hydroxypentyl)-5,5-dimethyl-4-(pyrrolidino)-2,5-dihydroimidazol-1-oxyl (**19b**) (300 MHz; CDCl<sub>3</sub>-CD<sub>3</sub>OD, reduced with Zn/CF<sub>3</sub>COOH in CD<sub>3</sub>OD, 65 °C)

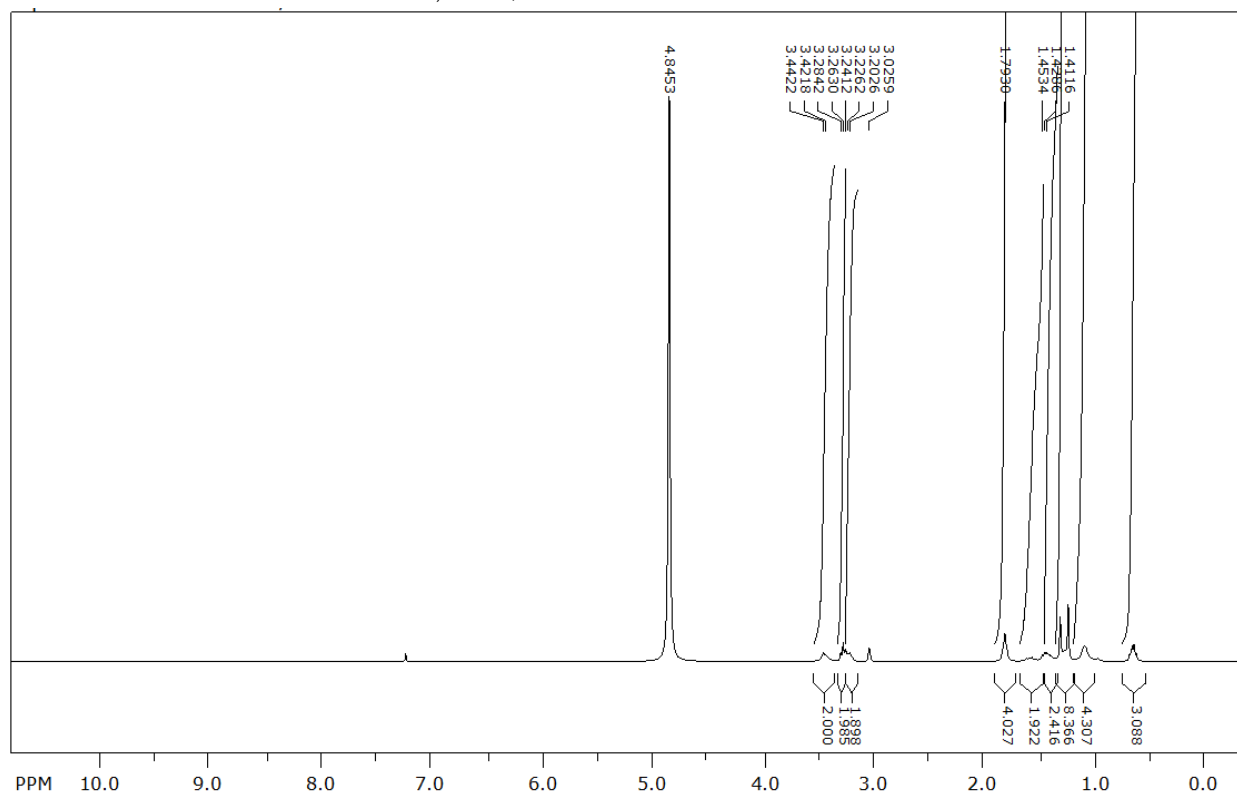

2.10. 2-(3-(3-(Diethylamino)propylcarbamoyloxy)propyl)-2-ethyl-5,5-dimethyl-4-(pyrrolidino)-2,5-dihydro-1H-imidazol-1-oxyl (**21**) (300 MHz; CDCl<sub>3</sub> – CD<sub>3</sub>OD, reduced with Zn/CF<sub>3</sub>COOH in CD<sub>3</sub>OD, 65 °C)

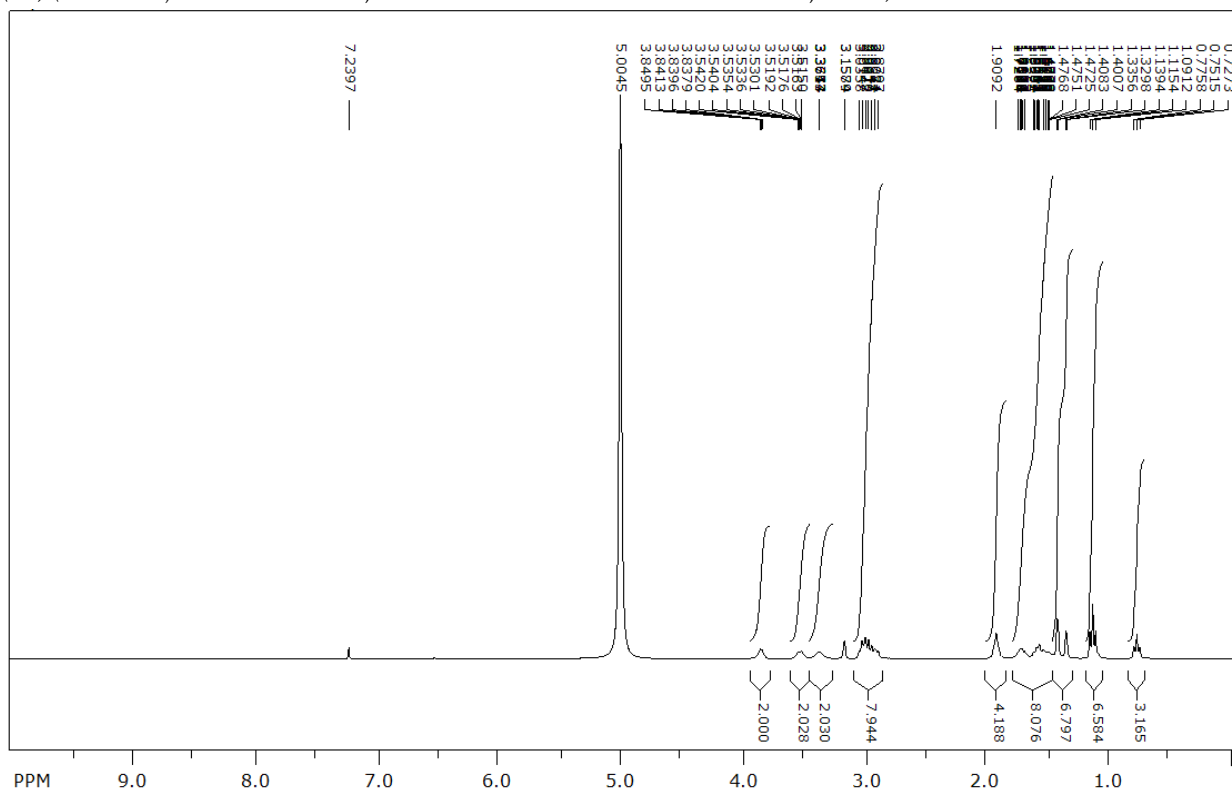

2.11. 2-(2-(2-carboxyethyl)-2-ethyl-5,5-dimethyl-4-(pyrrolidin-1-yl)-2,5-dihydro-1H-imidazol-1-oxyl (**25**) (300 MHz; CDCl<sub>3</sub> – CD<sub>3</sub>OD, reduced with Zn/CF<sub>3</sub>COOH in CD<sub>3</sub>OD, 65 °C)

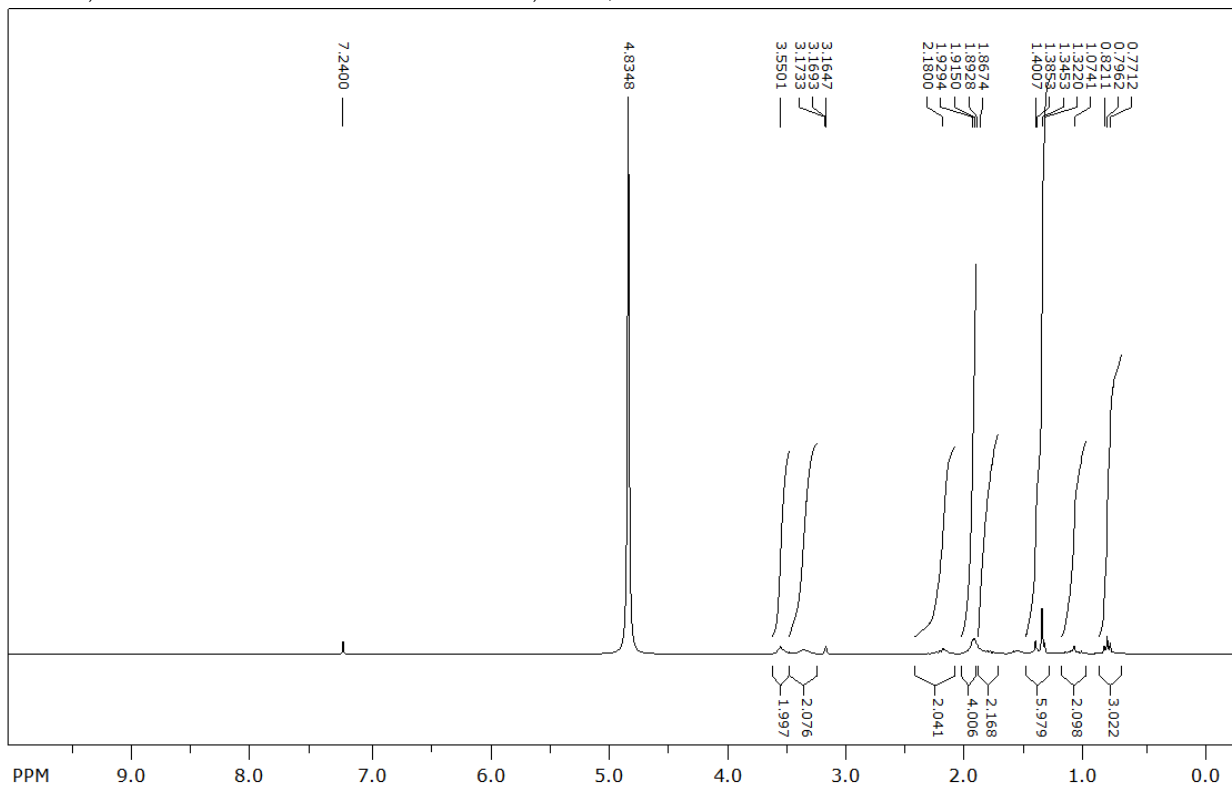

2.12. 1-(4-(1,3-dioxolan-2-yl)phenyl)-N-methylmethanamine (**26**) (300 MHz; CDCl<sub>3</sub>)

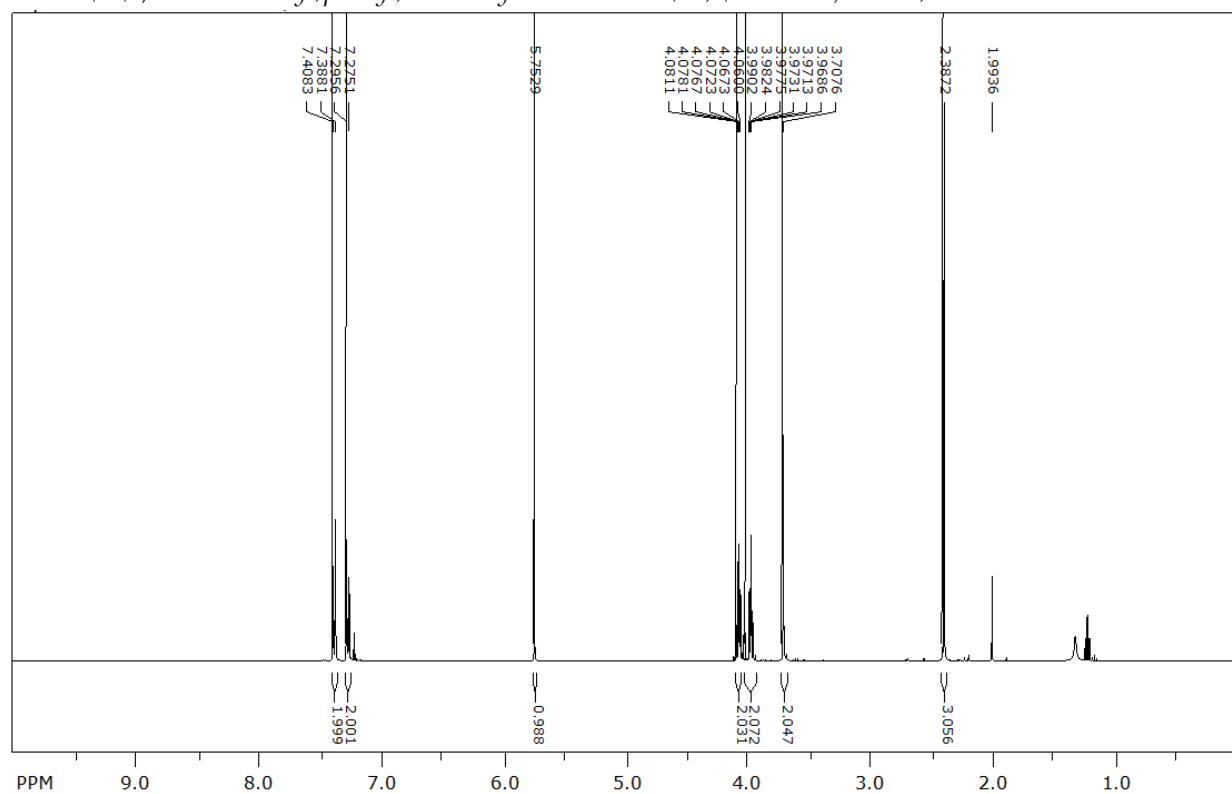

2.13. 5-((4-(1,3-dioxolan-2-yl)benzyl)(methyl)amino)-4,4-dimethyl-2-(pyridin-4-yl)-4H-imidazole 3-oxide (**30**) (400 MHz; CDCl<sub>3</sub>)

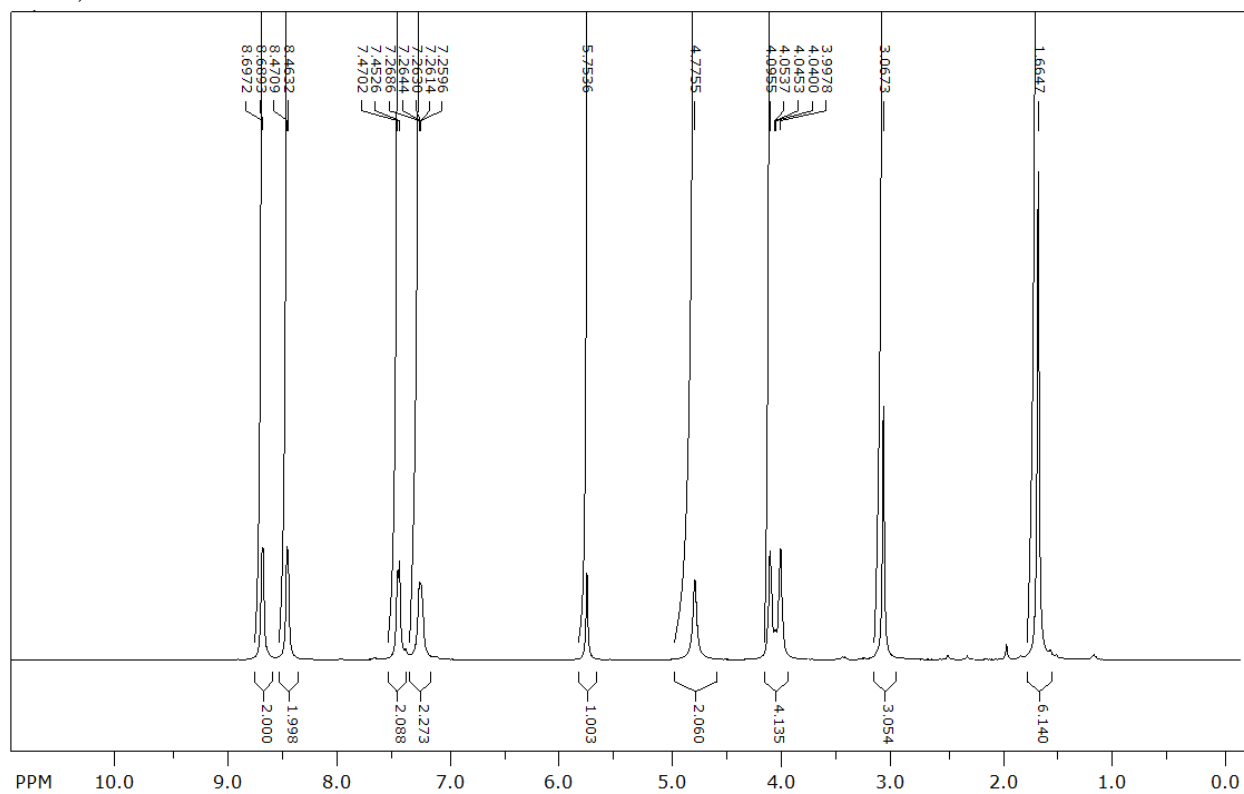

2.14. 2-Ethyl-4-((4-(hydroxymethyl)benzyl)(methyl)amino)-5,5-dimethyl-2-(pyridin-4-yl)-2,5-dihydroimidazol-1-oxyl (**34**) (400 MHz; CDCl<sub>3</sub>, CD<sub>3</sub>OD, reduced with Zn/CF<sub>3</sub>COOH in CD<sub>3</sub>OD)

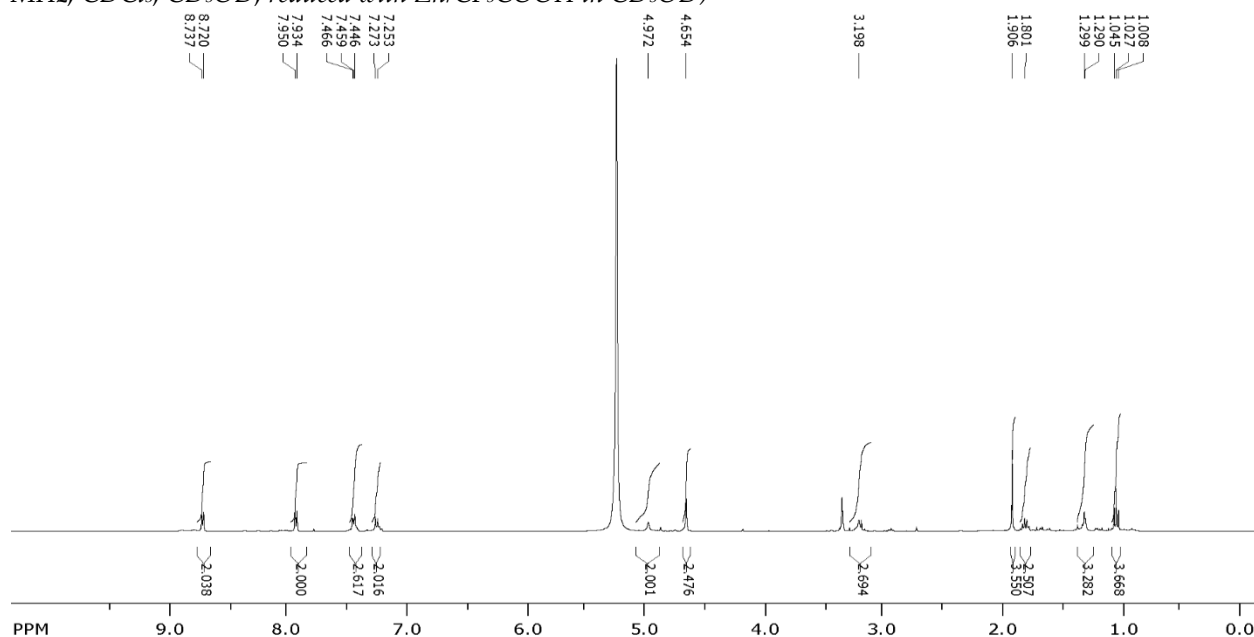

### 3. <sup>13</sup>C NMR Spectra

3.1. Tetraisopropyl but-3-yne-1,1-diylldiphosphonate(**6**)(75 MHz, CDCl<sub>3</sub>)

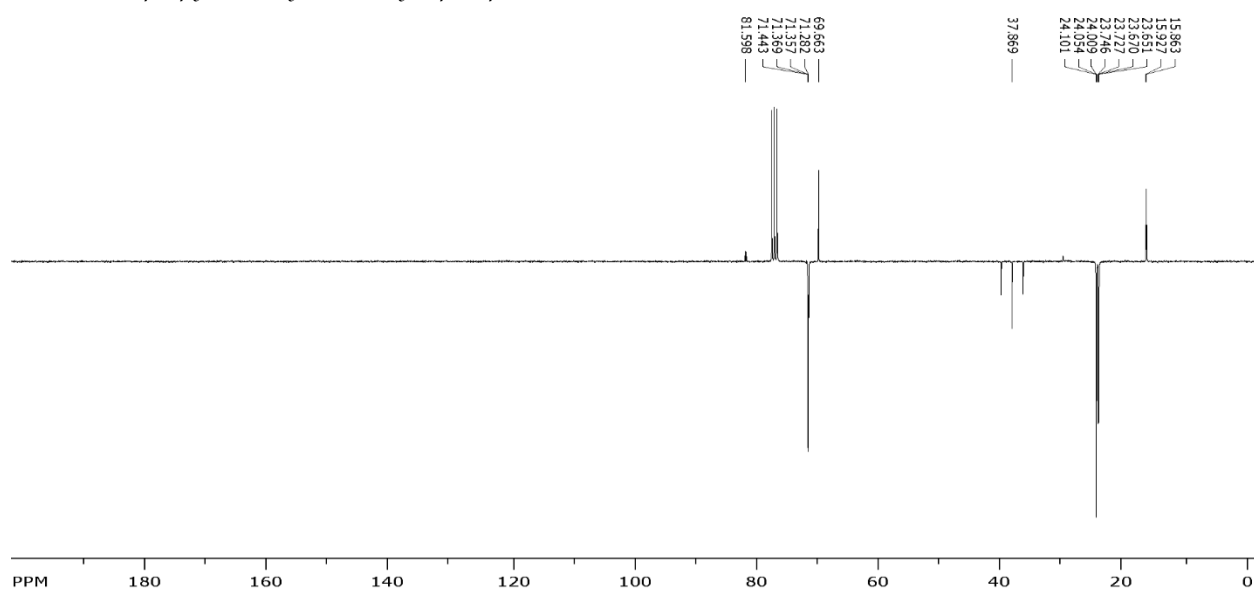

<sup>13</sup>C NMR spectrum of compound 10. The x-axis represents the chemical shift in PPM, ranging from 0 to 180. The spectrum shows several peaks, with the following chemical shifts labeled above the baseline:

- 35.7588
- 55.5462
- 65.0449
- 76.5793
- 76.8974
- 77.2159
- 103.4212
- 126.2842
- 127.8916
- 136.3100
- 141.1237

<sup>13</sup>C NMR spectrum (CDCl<sub>3</sub>) of compound 10. The x-axis represents the chemical shift in PPM, ranging from 0 to 180. The spectrum shows several sharp peaks, with the most intense at 76.7267 ppm (CDCl<sub>3</sub> solvent). Other labeled peaks include 21.4496, 21.4738, 21.4932, 21.5104, 21.5484, 21.5967, 35.1938, 35.2142, 53.0537, 64.9527, 75.7267, 76.2072, 76.6327, 77.0533, 102.8513, 120.8831, 120.9665, 126.6629, 126.7684, 133.8546, 136.3742, 136.3921, 137.4360, 149.7963, and 172.2938 ppm.

---

#### 4. Titration Data.

##### 4.1. 2-(4-(Azidomethyl)phenyl)-2,5,5-triethyl-4-pyrrolidino-2,5-dihydro-1H-imidazol-1-oxyl (5)

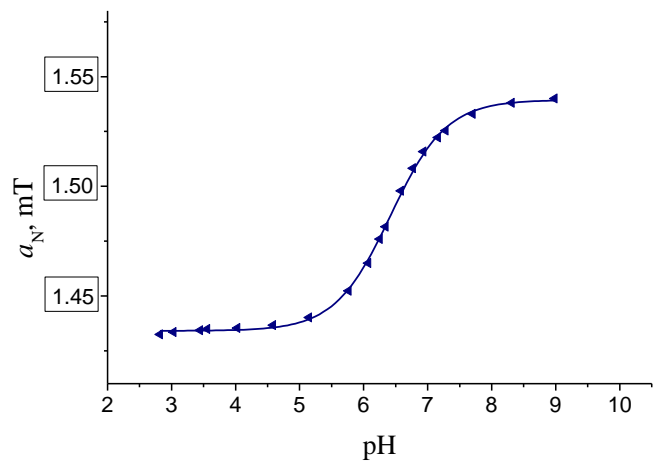

##### 4.2. 2-(4-((4-(2,2-Bis(diisopropoxyphosphoryl)ethyl)-1H-1,2,3-triazol-1-yl)methyl)phenyl)-2,5,5-triethyl-4-pyrrolidino-2,5-dihydro-1H-imidazol-1-oxyl (7)

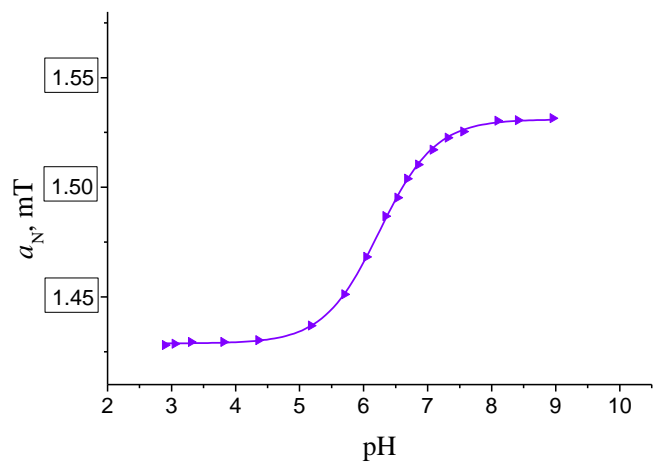

4.3. 2,5,5-Triethyl-2-(4-ethynylphenyl)-4-pyrrolidino-2,5-dihydro-1H-imidazol-1-oxyl (**11**)

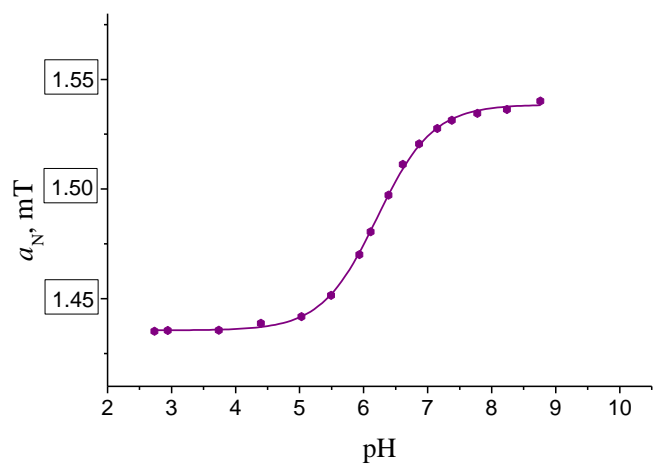

4.4 2-(4-Carboxyphenyl)-2,5,5-triethyl-4-pyrrolidino-2,5-dihydro-1H-imidazol-1-oxyl (**12**)

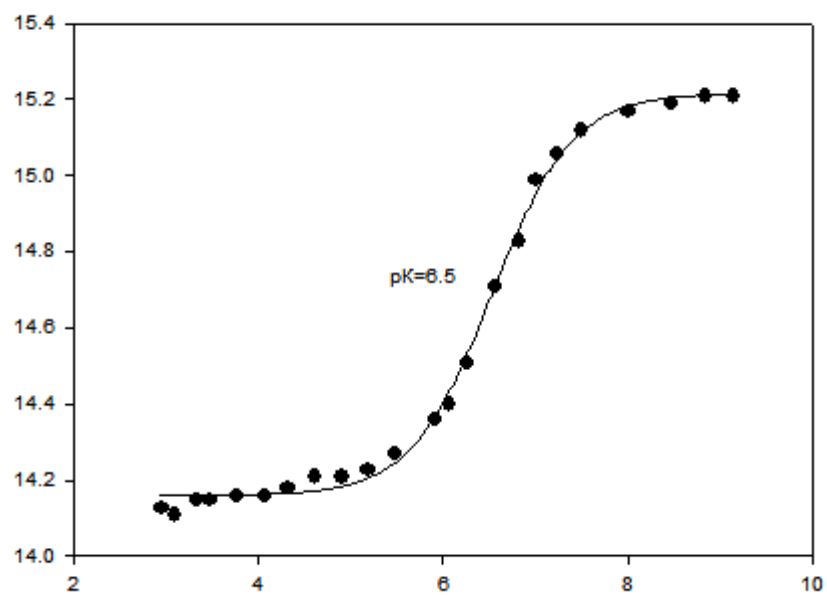

4.5. 2-(4-((2,5-Dioxopyrrolidinoxy)carbonyl)phenyl)-2,5,5-triethyl-4-pyrrolidino-2,5-dihydro-1H-imidazol-1-oxyl (**15**)

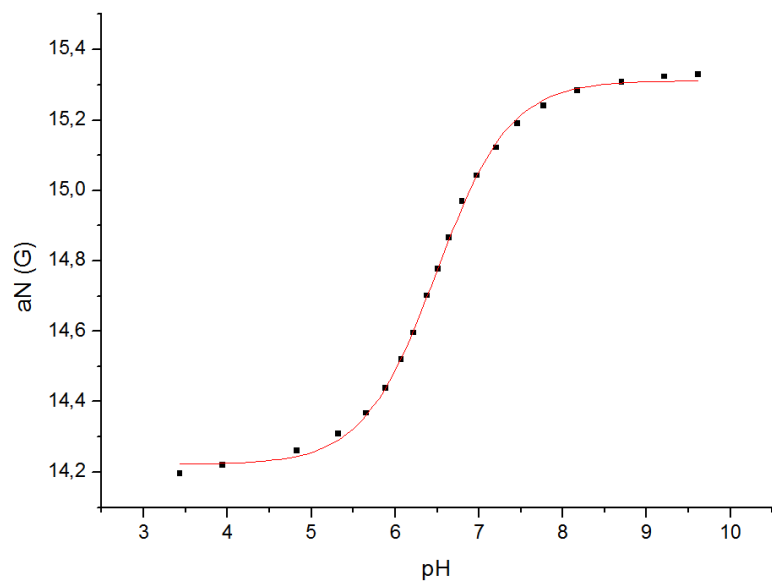

4.6. 2-(4-((3-Carboxypropanoyloxy)methyl)phenyl)-2,5,5-triethyl-4-pyrrolidino-2,5-dihydro-1H-imidazol-1-oxyl (**16**)

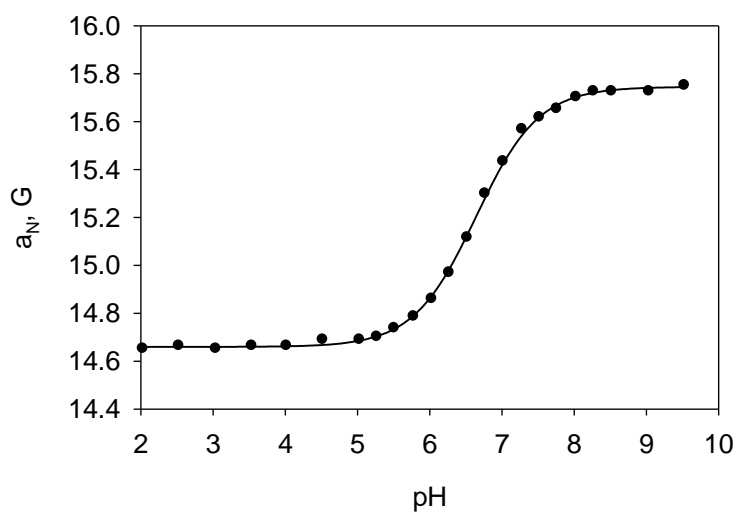



4.7. 2-Allyl-2-ethyl-5,5-dimethyl-4-(pyrrolidino)-2,5-dihydroimidazol-1-oxyl (**18a**)

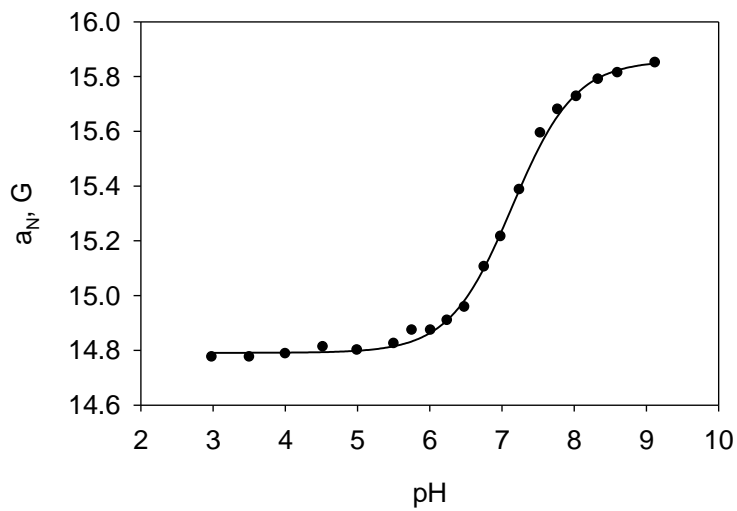

4.8. 2-Ethyl-5,5-dimethyl-2-(pent-4-enyl)-4-(pyrrolidino)-2,5-dihydroimidazol-1-oxyl (**18b**)

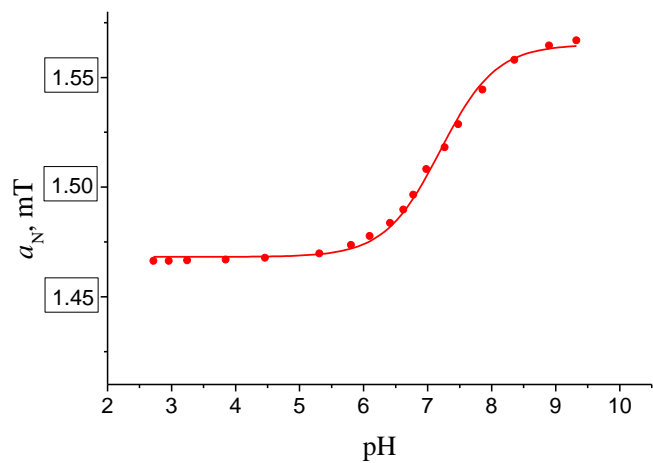

4.9. 2-Ethyl-2-(3-hydroxypropyl)-5,5-dimethyl-4-(pyrrolidino)-2,5-dihydroimidazol-1-oxyl (**19a**)

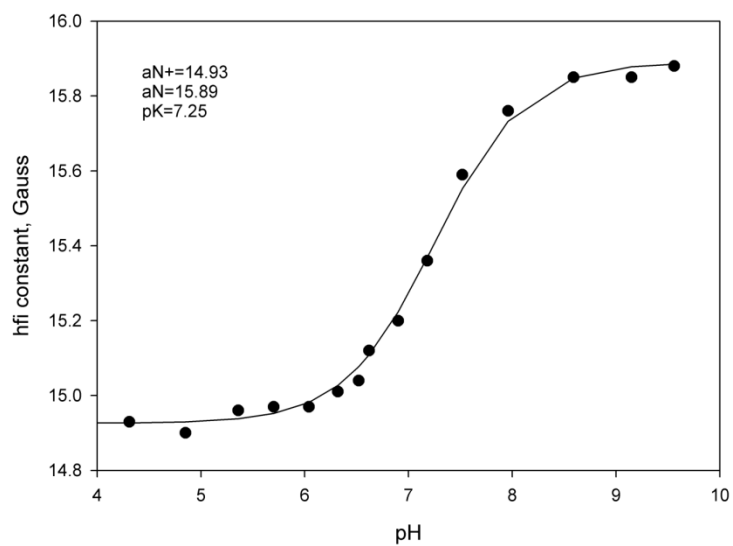

4.10. 2-Ethyl-2-(5-hydroxypentyl)-5,5-dimethyl-4-(pyrrolidino)-2,5-dihydroimidazol-1-oxyl (**19b**)

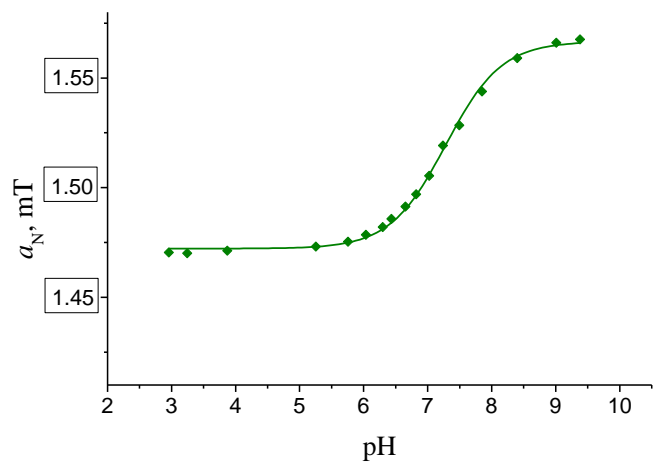

4.11. 2-(3-(1H-Imidazole-1-carboxyloxy)propyl)-2-ethyl-5,5-dimethyl-4-(pyrrolidino)-2,5-dihydro-1H-imidazol-1-oxyl (**20a**)

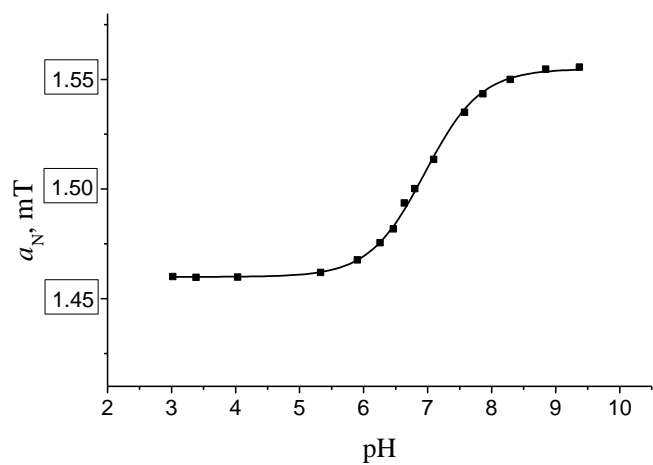

4.12. 2-(3-(3-(Diethylamino)propylcarbamoyloxy)propyl)-2-ethyl-5,5-dimethyl-4-(pyrrolidino)-2,5-dihydro-1H-imidazol-1-oxyl (**21**)

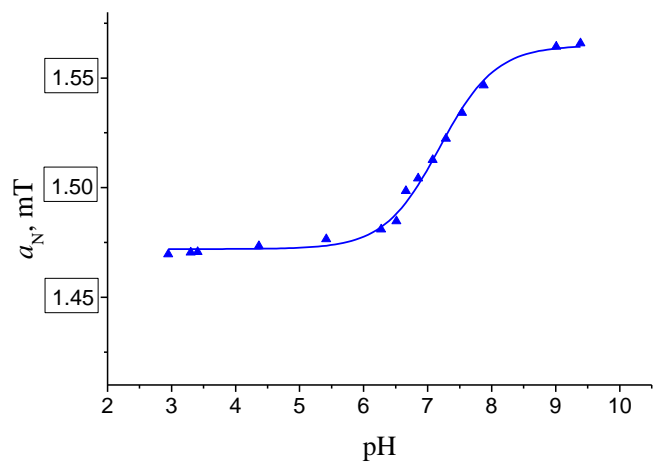

4.13. 2-(3-Carboxypropyl)-2-ethyl-5,5-dimethyl-4-(pyrrolidino)-2,5-dihydro-1H-imidazol-1-oxyl (22)

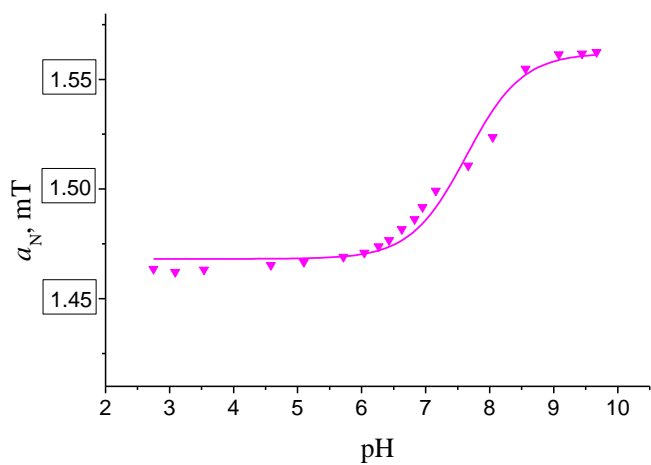

4.14. 2-(2-(1,3-dioxo-lan-2-yl)ethyl)-2-ethyl-5,5-dimethyl-4-(pyrrolidin-1-yl)-2,5-dihydro-1H-imidazol-1-oxyl (23)

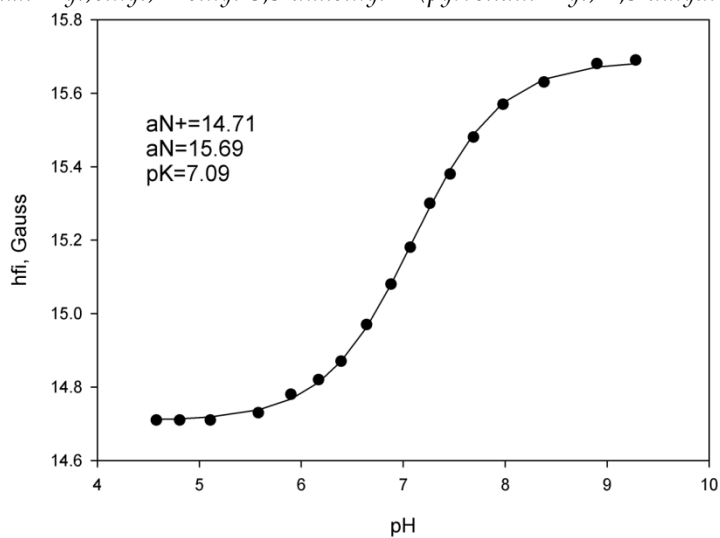

4.15. 2-(2-carboxyethyl)-2-ethyl-5,5-dimethyl-4-(pyrrolidin-1-yl)-2,5-dihydro-1H-imidazol-1-oxyl (25)

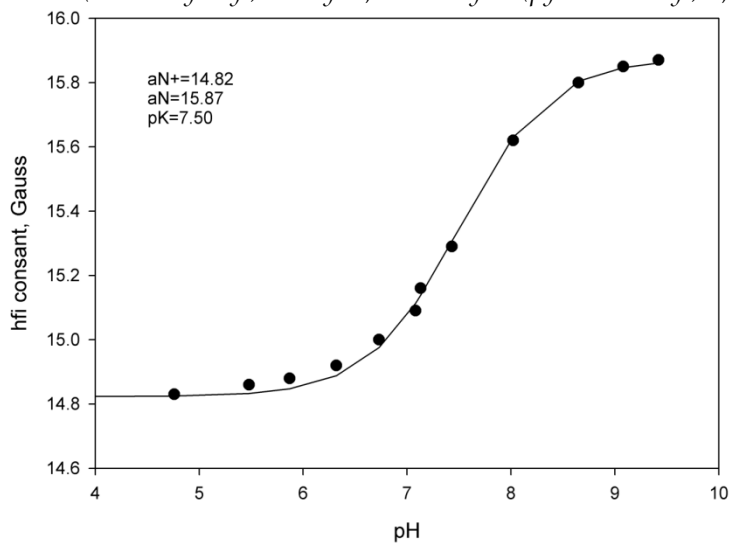

4.16. 2-ethyl-4-((4-formylbenzyl)(methyl)amino)-5,5-dimethyl-2-(pyridin-4-yl)-2,5-dihydro-1H-imidazol-1-oxyl (32)

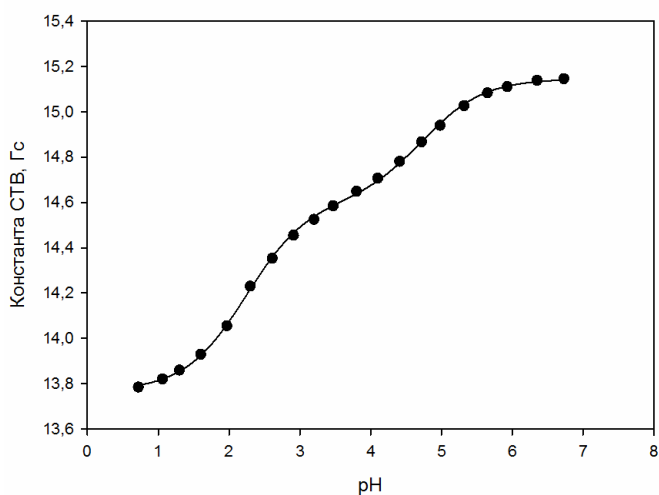

4.17. 4-((4-carboxybenzyl)(methyl)amino)-2-ethyl-5,5-dimethyl-2-(pyridin-4-yl)-2,5-dihydro-1H-imidazol-1-oxyl (33)

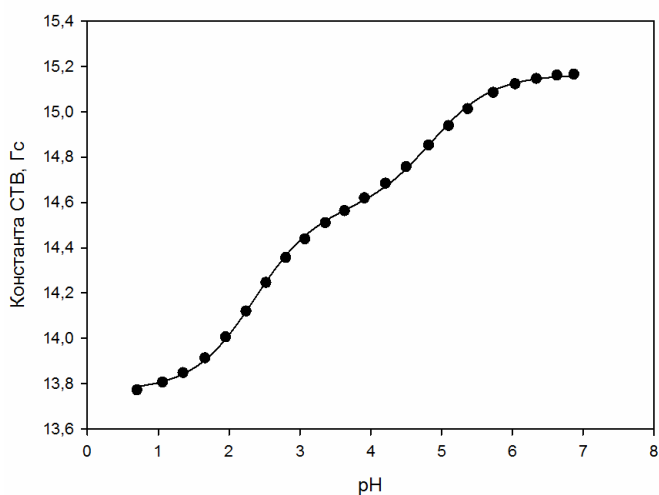

4.18. 2-ethyl-4-((4-(hydroxymethyl)benzyl)(methyl)amino)-5,5-dimethyl-2-(pyridin-4-yl)-2,5-dihydro-1H-imidazol-1-oxyl (34)

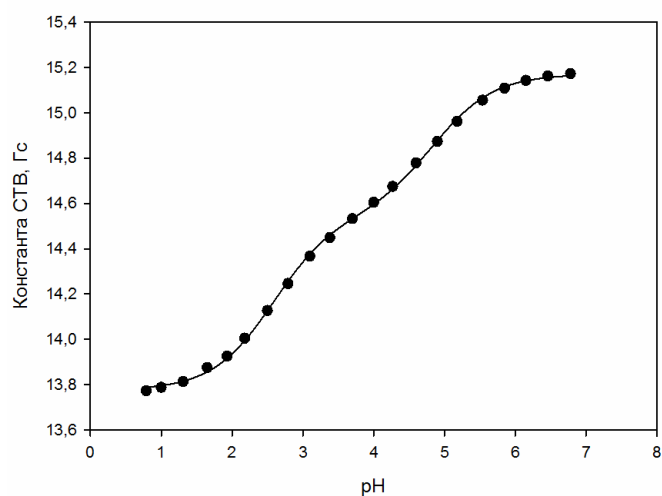

4.19. 4-((4-(((2,5-dioxopyrrolidin-1-yl)oxy)carbonyl)benzyl)(methyl)amino)-2-ethyl-5,5-dimethyl-2-(pyridin-4-yl)-2,5-dihydro-1H-imidazol-1-oxyl (35)

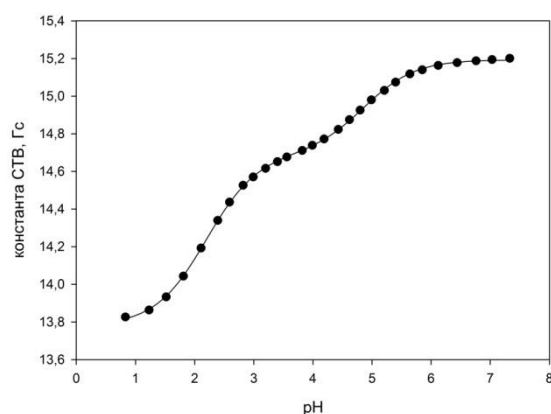

## 5. X-Ray Data for Nitroxide 11.

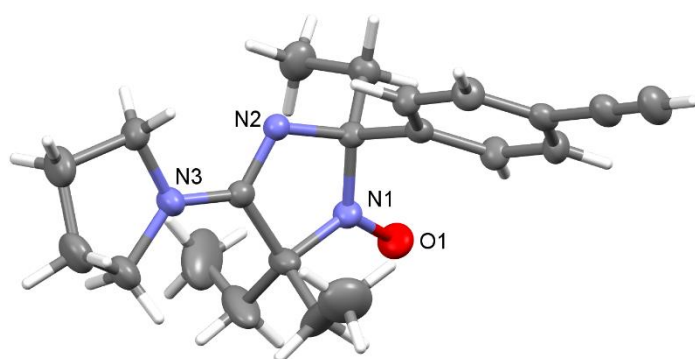

**Figure S1.** The molecular structure of 2,5,5-triethyl-2-(4-ethynylphenyl)-4-pyrrolidino-2,5-dihydro-1H-imidazol-1-oxyl (11) (minor position of disordered geminal ethyl group is omitted).

Crystallographic data for **11**:  $C_{21}H_{28}N_3O$ ,  $M$  338.46, monoclinic,  $P2_1/c$ ,  $a$  8.7388(3),  $b$  15.2737(6),  $c$  14.5589(6) Å,  $\beta$  100.656(2)°  $V$  1909.7(1) Å<sup>3</sup>,  $Z$  4,  $D_{\text{calcd}}$  1.177 g·cm<sup>-3</sup>,  $\mu(\text{Mo-K}\alpha)$  0.073 mm<sup>-1</sup>,  $F(000)$  732, ( $\theta$  2.67 – 25.36°, completeness 99.9%),  $T$  200(2) K, orange needle, (1.00 × 0.32 × 0.14) mm<sup>3</sup>, transmission 0.782 – 0.862, 18099 measured reflections in index range  $-10 \leq h \leq 10$ ,  $-18 \leq k \leq 18$ ,  $-17 \leq l \leq 17$ , 3513 independent ( $R_{\text{int}}$  0.0351), 243 parameters,  $R_1$  0.0434 (for 2820 observed  $I > 2\sigma(I)$ ),  $wR_2$  0.1154 (all data), GOOF 1.025, largest diff. peak and hole 0.27 and -0.28 e.Å<sup>-3</sup>.
